# Supplementary material for: Structural properties and influence of solvent on the stability of telomeric four-stranded i-motif DNA
Source: Royal Society of Chemistry journal article supplement (doi:10.1039/c9cp03253c), 2019-01-01

## Electronic Supplementary Information

### Structural properties and influence of solvent in the stability of telomeric four-stranded i-motif DNA

Manas Mondal<sup>1,2</sup>, Dhananjay Bhattacharyya<sup>3</sup>, Yi Qin Gao<sup>1,2\*</sup>

<sup>1</sup>*Institute of Theoretical and Computational Chemistry, College of Chemistry and Molecular Engineering, Beijing National Laboratory for Molecular Sciences, Peking University, Beijing 100871, China*

<sup>2</sup>*BIOPIC, Peking University, Beijing 100871, China*

<sup>3</sup>*Computational Science Division, Saha Institute of Nuclear Physics, 1/AF Bidhannagar, Kolkata 700064, India*

\*Corresponding authors:

E-mail: [gaoyq@pku.edu.cn](mailto:gaoyq@pku.edu.cn)

## Table and Figure legends:

Table S1: Base pair orientational parameters in model C<sup>+</sup>C<sup>+</sup>C<sup>+</sup>/CCC trinucleotide structure (ABC/DEF) as derived from the NMR structure of i-motif DNA (PDB id: 1EL2).

Table S2: Configurational entropy of the core and loop regions of the i-motif in 3'E and 5'E-form structure with hemi-protonated cytosines, derived from the normal mode analysis of equilibrated MD simulated trajectory at 300K.

Table S3: Average value along with standard deviation of the base pair parameters as found in experimental dataset and MD simulation of 3'E and 5'E-form structure under acidic pH with hemi-protonated cytosines having two different topologies.

Table S4: Average value along with standard deviation of the backbone dihedral angles for the bases as found in MD simulation of 5'E-form i-motif structure under acidic pH with hemi-protonated cytosines.

Table S5: Average value along with standard deviation of the backbone dihedral angles for the bases as found in MD simulation of 3'E-form i-motif structure under acidic pH with hemi-protonated cytosines.

Table S6: Average value along with standard deviation of the base pair parameters as found in MD simulation of 5'E-form structure in deprotonated state with normal cytosines.

Table S7: Average value along with standard deviation of the backbone dihedral angles for the bases as found in MD simulation of 5'E-form structure in deprotonated state with normal cytosines.

Table S8: Average hydrogen bonding geometry and occupancy (considering C – O distance  $\leq 3.4$  Å and C-H...O angle  $> 120^\circ$ ) of possible C-H...O mediated hydrogen bond between sugar moieties of the antiparallel strands along the narrow grooves of i-motif DNA.

Table S9: Base pairing and stacking energy between the stacked base pairs in model C<sup>+</sup>C<sup>+</sup>C<sup>+</sup>/CCC trinucleotide structure (ABC/DEF) as derived from the NMR structure of i-motif DNA (PDB id: 1EL2).

Table S10: Variation of stacking energy between the stacked base pairs in model C<sup>+</sup>C<sup>+</sup>C<sup>+</sup>/CCC trinucleotide structure (ABC/DEF) with stacking interval between the consecutive base pairs.

Table S11: Average hydrogen bonding geometry and occupancy (considering C – O distance  $\leq 3.4$  Å and C-H...O angle  $> 120^\circ$ ) of possible C-H...O mediated hydrogen bond between sugar moieties of the antiparallel strands along the narrow grooves of i-motif DNA at elevated temperatures.

Table S12: Average value along with standard deviation of the base pair step parameters as found in MD simulation of 5'E<sub>GCC</sub> and 5'E<sub>CGG</sub> form structure (':' denotes base pair and '::' denotes base pairs stack).

Table S13: Average value along with standard deviation of stacking interval and twist between consecutive stacked base pair within i-motif core as found in MD simulation of 5'E<sub>GCC</sub> and 5'E<sub>CGG</sub>-form structure (':' denotes base pair and '::' denotes base pairs stack).

Table S14: Average value along with standard deviation of the backbone dihedral angles for the bases as found in MD simulation of 5'E<sub>GCC</sub>-form structure.

Table S15: Average value along with standard deviation of the backbone dihedral angles for the bases as found in MD simulation of 5'E<sub>CGG</sub>-form structure.

Table S16: Average hydrogen bonding geometry and occupancy (considering C – O distance  $\leq 3.4$  Å and C-H...O angle  $> 120^\circ$ ) of possible C-H...O mediated hydrogen bond between sugar moieties of the antiparallel strands along the narrow grooves of 5'E<sub>GCC</sub> and 5'E<sub>CGG</sub> i-motif DNA.

Fig. S1: Variation of RMSD with respect to the initial energy minimized structure in case of studied i-motif systems: (a) 3'E-form structure with hemi-protonated cytosines and normal cytosines at 300K, (b) 3'E-form structure with hemi-protonated cytosines at elevated temperatures, (c) 5'E-form structure with hemi-protonated cytosines and normal cytosines at 300K, (d) 5'E-form structure with hemi-protonated cytosines at elevated temperatures, (e) 5'E<sub>GCC</sub> and 5'E<sub>CGG</sub>-form structure with hemi-protonated cytosines at 300K and (f) 5'E-form structure with hemi-protonated cytosines and normal cytosine at 300K with TIP3P water model.

Fig. S2: Representative backbone refined conformations of model (a)-(h)  $C^+C^+C^+/CCC$  trinucleotide structures having different rotational orientation of intercalated base pair about its base pair helix axis and (i)-(p) tetranucleotide structures of two intercalated  $C^+C^+/CC$  dinucleotides with different helical rotations around their base pair helix axis.

Fig. S3: Root mean square fluctuation (RMSF) of the nucleotides in (a) 3'E and (b) 5'E-form i-motif structure under acidic pH with hemi-protonated cytosines.

Fig. S4: Distribution of distance between the N3 atoms of paired bases in equilibrated MD trajectory of 3'E (a) and 5'E-form (b) i-motif structure with hemi-protonated cytosines, and distance matrix for the nucleobases in equilibrated conformation of 3'E (c) and 5'E-form (d) i-motif structure with hemi-protonated cytosines.

Fig. S5: Variation of distance between the N3 atoms of paired bases along the MD simulated trajectory of 3'E (a)-(b) and 5'E-form (c)-(d) structure in deprotonated state with normal cytosines.

Fig. S6: Average conformation of (a) 3'E and (b) 5'E-form structure, and distance matrix for the nucleobases in equilibrated conformation of (c) 3'E and (d) 5'E-form structure under neutral pH with deprotonated cytosines.

Fig. S7: Variation of distance between the N3 atoms of paired bases along the MD simulated trajectory of 3'E (a) and 5'E-form (b) structure in deprotonated state with normal cytosine considering larger simulation box, and considering TIP3P water model in case of 5'E-form structure (c).

Fig. S8: 1<sup>st</sup> and 2<sup>nd</sup> normal mode of motions in the equilibrated MD trajectory of (a)-(b) 3'E and (c)-(d) 5'E-form structure under neutral pH with deprotonated cytosines.

Fig. S9: Average structure of i-motif core in the equilibrated MD trajectory of (a) 3'E and (b) 5'E-form topology under acidic pH with hemi-protonated cytosines.

Fig. S10: Average values along with standard deviations of narrow grooves and wide grooves backbone phosphate-phosphate distances in (a)-(b) 3'E and (c)-(d) 5'E-form i-motif structure under acidic pH with hemi-protonated cytosines.

Fig. S11: Variation of energy of the sugar-phosphate backbone refined conformation of model (a)  $C^+C^+C^+/CCC$  trinucleotide structure with helical rotations ( $\theta$ ) of the intercalated base pair around their base pair helix axis, and (b) tetranucleotide conformations of two intercalated  $C^+C^+/CC$  dinucleotides with helical rotations ( $\theta$ ) around their base pair helix axis.

Fig. S12: Radial distributions of the oxygen (O) atom of solvent water molecule around backbone phosphate group of bases ( $g(r_{p-o})$ ) within i-motif core with hemi-protonated cytosines under acidic pH for (a) 3'E and (b) 5'E-form structure, and in deprotonated state of cytosines under neutral pH for (c) 3'E and (d) 5'E-form structure.

Fig. S13: Radial distributions of the oxygen (O) atoms of solvent water molecule around N4 atom of cytosines ( $g(r)$ ) within i-motif core in hemi-protonated and deprotonated state of cytosines for (a) 3'E and (b) 5'E-form structure considering SPC/E water model, and (c) 5'E-form structure considering TIP3P water model.

Fig. S14: Radial distributions of the oxygen (O) atoms of solvent water molecule around N4 atom of cytosines ( $g(r_{N4-o})$ ) within i-motif core at elevated temperatures with hemi-protonated cytosines under acidic pH for (a) 3'E and (b) 5'E-form i-motif structure.

Fig. S15: (a) DFT optimized geometry of six water molecules in wider grooves first solvation cell considering MD average model conformation of  $C^+C^+C^+/CCC$  trinucleotide within the i-motif core and fixing all the non-hydrogen atoms of the bases. (b) DFT optimized structure of a water molecule along with cytosine base.

Fig. S16: First normal mode of motions at different temperature in the equilibrated MD trajectory of (a)-(c) 3'E and (d)-(f) 5'E-form i-motif structure under acidic pH with hemi-protonated cytosines.

Fig. S17: Root mean square fluctuation (RMSF) of the nucleotides at different temperature in (a) 3'E and (b) 5'E-form i-motif structure with hemi-protonated cytosines under acidic pH.

Fig. S18: At different temperature distribution of wide grooves width in (a) 3'E and (b) 5'E-form structure, narrow grooves width in (c) 3'E and (d) 5'E-form structure, and hydrogen bonding distance and angle between sugar oxygen O4' of one strand and C1' on the anti-parallel strand across the narrow grooves in (e) 3'E and (f) 5'E-form structure, as derived from the equilibrated

MD trajectory of i-motif DNA under acidic pH with hemi-protonated cytosines.

Fig. S19: Temperature dependent grid water density distribution ( $\rho_{\text{wat}}$ ) around the i-motif core in (a)-(c) 3'E and (d)-(f) 5'E-form structure under acidic pH having probability of water molecules stay in that grid points greater than 0.5. Grid points are represented with a sphere of color tints wheat.

Fig. S20: (a) At different temperature distribution of number of water molecules forming hydrogen bonds with the N4 atom of cytosines in the wide grooves of 5'E-form i-motif DNA in equilibrated trajectory under acidic pH. (b) Distribution of hydrogen bonded life time at different temperature for the hydrogen bonded water molecules in the wide grooves of 5'E-form structure with hemi-protonated cytosines.

Fig. S21: In case of 5'E<sub>CGG</sub> (a)-(b) and 5'E<sub>GCC</sub> (c)-(d) form structure first two normal modes of motions in the equilibrated trajectory. Distribution of (e) narrow grooves width and (f) hydrogen bonding distance and angle between sugar oxygen O4' of one strand and C1' on the anti-parallel strand across the narrow minor grooves in 5'E (TAA), 5'E<sub>CGG</sub> (CGG) and 5'E<sub>GCC</sub> (GCC) form structure, as derived from the equilibrated MD trajectory of i-motif DNA under acidic pH with hemi-protonated cytosines.

## Tables:

Table S1: Base pair orientational parameters in model C<sup>+</sup>C<sup>+</sup>C<sup>+</sup>/CCC trinucleotide structure (ABC/DEF) as derived from the NMR structure of i-motif DNA (PDB id: 1EL2).

| System                                                                                          | Base pair step parameters |           |             |             |            |          |               |
|-------------------------------------------------------------------------------------------------|---------------------------|-----------|-------------|-------------|------------|----------|---------------|
|                                                                                                 | Base pair step            | Shift (Å) | Slide (Å)   | Rise (Å)    | Tilt (°)   | Roll (°) | Twist (°)     |
| ABC/DEF<br>(C <sup>+</sup> C <sup>+</sup> C <sup>+</sup> /CCC)<br>trinucleotide<br>conformation | AB/EF<br>(A:F :: B:E)     | -0.89     | 0.47        | 3.37        | 1.34       | 1.49     | 93.97         |
|                                                                                                 | BC/DE<br>(B:E :: C:D)     | 0.17      | 0.72        | 2.81        | 6.37       | 0.10     | 106.89        |
|                                                                                                 | Base pair parameters      |           |             |             |            |          |               |
|                                                                                                 | Base pair                 | Shear (Å) | Stagger (Å) | Stretch (Å) | Buckle (°) | Open (°) | Propeller (°) |
|                                                                                                 | A:F                       | -0.13     | -0.42       | 2.76        | -6.78      | -0.11    | -0.64         |
|                                                                                                 | B:E                       | -0.55     | -0.12       | 2.75        | -12.79     | 0.85     | 1.08          |
|                                                                                                 | C:D                       | 0.69      | 0.06        | 2.73        | -7.25      | -0.47    | 3.13          |

Table S2: Configurational entropy of the core and loop regions of the i-motif in 3'E and 5'E-form structure with hemi-protonated cytosines, derived from the normal mode analysis of equilibrated MD simulated trajectory at 300K.

| System                               | Structural region | Configurational Entropy (cal/mol-K) |
|--------------------------------------|-------------------|-------------------------------------|
| 3'E-form structure<br>(3'E topology) | Core              | 690.68                              |
|                                      | Loop1             | 378.08                              |
|                                      | Loop2             | 415.92                              |
|                                      | Loop3             | 368.56                              |
| 5'E-form structure<br>(5'E topology) | Core              | 607.20                              |
|                                      | Loop1             | 368.04                              |
|                                      | Loop2             | 352.06                              |
|                                      | Loop3             | 353.23                              |

Table S3: Average value along with standard deviation of the base pair parameters as found in experimental dataset and MD simulation of 3'E and 5'E-form structure under acidic pH with hemi-protonated cytosines having two different topologies.

| System                               | Base pair            | Shear<br>(Å)    | Stagger<br>(Å)  | Stretch<br>(Å) | Buckle<br>(°)     | Open<br>(°)     | Propeller<br>(°) |
|--------------------------------------|----------------------|-----------------|-----------------|----------------|-------------------|-----------------|------------------|
| Experimental Dataset                 | C:C <sup>+</sup>     | -0.33<br>[0.60] | 0.07<br>[0.35]  | 2.62<br>[0.20] | 0.95<br>[8.79]    | 0.83<br>[2.97]  | 0.86<br>[8.80]   |
| 3'E-form structure<br>(3'E topology) | C1:C <sup>+</sup> 12 | -0.22<br>[0.35] | -0.18<br>[0.44] | 2.88<br>[0.12] | 13.19<br>[9.78]   | -3.44<br>[4.11] | -4.49<br>[7.33]  |
|                                      | C2:C <sup>+</sup> 13 | -0.58<br>[0.25] | 0.05<br>[0.29]  | 2.80<br>[0.09] | 5.37<br>[9.12]    | -2.09<br>[3.16] | 2.82<br>[5.85]   |
|                                      | C6:C <sup>+</sup> 17 | -0.57<br>[0.25] | 0.09<br>[0.29]  | 2.81<br>[0.09] | 13.11<br>[8.75]   | -2.71<br>[3.06] | 3.42<br>[5.43]   |
|                                      | C7:C <sup>+</sup> 18 | -0.35<br>[0.25] | 0.06<br>[0.30]  | 2.85<br>[0.08] | 11.67<br>[8.63]   | -2.86<br>[2.95] | -3.21<br>[6.05]  |
|                                      | T5:T16               | -2.06<br>[0.43] | 0.27<br>[0.55]  | 2.95<br>[0.18] | -16.41<br>[10.18] | -0.62<br>[7.11] | 15.64<br>[9.94]  |
| 5'E-form structure<br>(5'E topology) | C1:C <sup>+</sup> 13 | -0.45<br>[0.27] | 0.02<br>[0.31]  | 2.82<br>[0.09] | -3.82<br>[8.34]   | -2.41<br>[3.28] | 6.10<br>[6.47]   |
|                                      | C2:C <sup>+</sup> 14 | -0.56<br>[0.25] | 0.02<br>[0.29]  | 2.80<br>[0.08] | 10.33<br>[8.29]   | -1.87<br>[2.96] | 2.72<br>[5.69]   |
|                                      | C3:C <sup>+</sup> 15 | -0.36<br>[0.29] | 0.05<br>[0.31]  | 2.84<br>[0.09] | 15.77<br>[9.12]   | -2.50<br>[3.06] | -0.77<br>[6.78]  |
|                                      | C7 <sup>+</sup> :C19 | -0.18<br>[0.31] | 0.05<br>[0.36]  | 2.86<br>[0.09] | -12.15<br>[14.11] | 2.67<br>[3.43]  | 7.71<br>[9.49]   |
|                                      | C8 <sup>+</sup> :C20 | -0.70<br>[0.24] | 0.05<br>[0.27]  | 2.78<br>[0.09] | 3.77<br>[8.73]    | 2.71<br>[3.23]  | 0.93<br>[5.82]   |
|                                      | C9 <sup>+</sup> :C21 | -0.52<br>[0.25] | -0.01<br>[0.29] | 2.83<br>[0.09] | 14.15<br>[8.19]   | 2.66<br>[3.14]  | -1.68<br>[5.47]  |
|                                      | T10:T22              | 2.47<br>[0.28]  | 0.00<br>[0.42]  | 2.84<br>[0.12] | 20.19<br>[8.85]   | -1.40<br>[5.61] | -16.57<br>[7.45] |

Table S4: Average value along with standard deviation of the backbone dihedral angles for the bases as found in MD simulation of 5'E-form i-motif structure under acidic pH with hemi-protonated cytosines.

| Nucleotide        | $\alpha$ (°)     | $\beta$ (°)      | $\gamma$ (°)     | $\delta$ (°)     | $\epsilon$ (°)    | $\zeta$ (°)      | $\chi$ (°)        | Phase (°)        |
|-------------------|------------------|------------------|------------------|------------------|-------------------|------------------|-------------------|------------------|
| C1                | 0.00<br>[0.0]    | 0.00<br>[0.0]    | 65.50<br>[22.5]  | 88.79<br>[21.4]  | 200.27<br>[19.1]  | 275.07<br>[9.9]  | -127.60<br>[10.7] | 51.68<br>[41.6]  |
| C2                | 293.27<br>[15.8] | 174.64<br>[21.5] | 73.19<br>[27.2]  | 86.59<br>[10.3]  | 192.10<br>[10.4]  | 277.85<br>[8.2]  | -127.94<br>[8.4]  | 35.64<br>[27.2]  |
| C3                | 293.31<br>[26.0] | 176.78<br>[10.6] | 71.73<br>[23.3]  | 94.08<br>[19.5]  | 214.75<br>[15.4]  | 294.15<br>[10.4] | -125.34<br>[13.2] | 53.57<br>[43.6]  |
| T4                | 276.27<br>[27.1] | 220.08<br>[36.7] | 301.10<br>[14.1] | 142.80<br>[12.6] | 188.65<br>[9.5]   | 277.37<br>[9.2]  | -114.40<br>[14.7] | 154.97<br>[16.6] |
| A5                | 288.72<br>[9.7]  | 171.07<br>[8.7]  | 55.65<br>[9.7]   | 136.17<br>[12.1] | 230.14<br>[17.2]  | 289.39<br>[25.5] | -99.12<br>[14.5]  | 145.52<br>[19.8] |
| A6                | 190.18<br>[66.9] | 180.24<br>[11.6] | 58.34<br>[13.4]  | 150.02<br>[9.3]  | 209.52<br>[19.2]  | 280.66<br>[10.5] | -132.61<br>[26.8] | 177.43<br>[23.3] |
| C <sup>+</sup> 7  | 294.27<br>[9.36] | 182.68<br>[12.4] | 66.40<br>[9.5]   | 86.06<br>[8.6]   | 190.20<br>[11.6]  | 272.54<br>[11.9] | -124.71<br>[14.5] | 24.34<br>[13.2]  |
| C <sup>+</sup> 8  | 295.76<br>[10.6] | 181.26<br>[10.6] | 68.52<br>[9.3]   | 100.41<br>[20.8] | 188.32<br>[8.9]   | 275.30<br>[10.7] | -121.21<br>[11.0] | 46.06<br>[45.3]  |
| C <sup>+</sup> 9  | 292.61<br>[28.6] | 180.31<br>[10.2] | 76.32<br>[18.8]  | 125.24<br>[21.8] | 195.91<br>[14.4]  | 253.92<br>[24.4] | -111.04<br>[13.7] | 122.74<br>[40.7] |
| T10               | 290.17<br>[11.9] | 184.19<br>[22.4] | 56.88<br>[10.8]  | 137.96<br>[10.0] | 193.81<br>[14.6]  | 271.52<br>[20.5] | -96.76<br>[14.0]  | 149.41<br>[15.1] |
| A11               | 280.32<br>[13.5] | 69.59<br>[9.49]  | 179.67<br>[8.2]  | 146.36<br>[11.7] | 243.07<br>[28.4]  | 168.20<br>[11.4] | -133.02<br>[23.5] | 158.36<br>[18.0] |
| A12               | 75.59<br>[15.8]  | 182.29<br>[24.1] | 60.11<br>[13.1]  | 148.06<br>[9.1]  | 228.80<br>[34.0]  | 70.33<br>[34.2]  | -121.14<br>[22.4] | 167.81<br>[18.8] |
| C <sup>+</sup> 13 | 269.83<br>[17.9] | 168.71<br>[30.3] | 61.10<br>[13.7]  | 96.81<br>[21.5]  | 209.87<br>[25.1]  | 272.57<br>[14.4] | -138.58<br>[11.4] | 64.07<br>[38.3]  |
| C <sup>+</sup> 14 | 292.28<br>[21.3] | 173.53<br>[30.3] | 72.02<br>[18.0]  | 130.66<br>[19.6] | 198.58<br>[15.1]  | 260.62<br>[23.6] | -108.23<br>[16.2] | 135.25<br>[31.0] |
| C <sup>+</sup> 15 | 276.40<br>[24.8] | 181.50<br>[17.5] | 69.62<br>[34.7]  | 109.65<br>[19.8] | 236.59<br>[27.9]  | 273.22<br>[18.4] | -106.18<br>[14.4] | 103.76<br>[34.1] |
| T16               | 237.20<br>[46.4] | 193.16<br>[32.3] | 60.26<br>[14.91] | 145.69<br>[7.9]  | 199.96<br>[9.86]  | 282.87<br>[10.8] | -130.09<br>[14.6] | 163.42<br>[13.7] |
| A17               | 277.24<br>[12.0] | 172.33<br>[8.9]  | 48.86<br>[12.8]  | 136.15<br>[10.7] | 223.42<br>[20.31] | 289.68<br>[9.8]  | -92.19<br>[15.4]  | 146.04<br>[15.9] |
| A18               | 262.73<br>[41.4] | 173.27<br>[18.0] | 81.32<br>[25.4]  | 156.09<br>[7.3]  | 214.10<br>[30.0]  | 164.33<br>[21.8] | -94.10<br>[25.2]  | 179.20<br>[13.5] |
| C19               | 224.15<br>[29.8] | 177.66<br>[16.0] | 69.53<br>[38.6]  | 104.92<br>[24.1] | 203.87<br>[12.6]  | 280.29<br>[9.9]  | -117.05<br>[11.0] | 38.22<br>[51.9]  |
| C20               | 287.79<br>[27.6] | 172.51<br>[18.1] | 86.28<br>[30.8]  | 83.23<br>[9.6]   | 190.37<br>[10.5]  | 276.32<br>[8.6]  | -126.45<br>[9.3]  | 39.80<br>[24.8]  |
| C21               | 295.25<br>[20.1] | 177.06<br>[8.42] | 69.24<br>[16.15] | 82.31<br>[8.0]   | 197.30<br>[18.5]  | 278.44<br>[10.5] | -127.35<br>[8.6]  | 38.64<br>[19.8]  |
| T22               | 289.40<br>[21.5] | 152.57<br>[45.7] | 88.33<br>[33.2]  | 120.28<br>[40.0] | 0.00<br>[0.0]     | 0.00<br>[0.0]    | -122.07<br>[15.8] | 108.77<br>[46.8] |

Table S5: Average value along with standard deviation of the backbone dihedral angles for the bases as found in MD simulation of 3'E-form i-motif structure under acidic pH with hemi-protonated cytosines.

| Nucleotide        | $\alpha$ (°)     | $\beta$ (°)      | $\gamma$ (°)     | $\delta$ (°)     | $\epsilon$ (°)   | $\zeta$ (°)      | $\chi$ (°)        | Phase (°)        |
|-------------------|------------------|------------------|------------------|------------------|------------------|------------------|-------------------|------------------|
| C1                | 0.00<br>[0.0]    | 0.00<br>[0.0]    | 65.09<br>[25.4]  | 124.92<br>[21.0] | 235.57<br>[23.2] | 288.78<br>[11.6] | -129.75<br>[11.7] | 137.75<br>[22.5] |
| C2                | 231.57<br>[50.3] | 110.39<br>[52.3] | 188.77<br>[10.8] | 119.18<br>[21.6] | 227.06<br>[25.9] | 268.75<br>[21.9] | -127.23<br>[14.2] | 135.11<br>[14.8] |
| T3                | 76.43<br>[27.0]  | 159.50<br>[20.7] | 62.43<br>[17.3]  | 147.46<br>[7.1]  | 236.96<br>[36.5] | 284.11<br>[12.5] | -128.42<br>[16.9] | 165.00<br>[11.8] |
| T4                | 94.94<br>[39.0]  | 175.01<br>[13.7] | 300.14<br>[12.0] | 150.13<br>[9.1]  | 266.45<br>[24.2] | 71.59<br>[26.0]  | -128.53<br>[14.8] | 163.81<br>[13.9] |
| T5                | 246.77<br>[14.5] | 168.95<br>[14.4] | 55.35<br>[9.5]   | 94.51<br>[14.7]  | 186.82<br>[9.1]  | 276.13<br>[8.2]  | -107.45<br>[9.9]  | 2.97<br>[21.8]   |
| C6                | 300.37<br>[9.1]  | 173.03<br>[8.8]  | 65.10<br>[8.4]   | 84.94<br>[7.7]   | 193.94<br>[8.9]  | 279.25<br>[8.2]  | -131.57<br>[7.9]  | 26.84<br>[17.9]  |
| C7                | 301.01<br>[9.6]  | 180.15<br>[10.3] | 72.17<br>[10.4]  | 88.59<br>[7.2]   | 202.71<br>[17.8] | 287.51<br>[12.6] | -120.42<br>[15.2] | 34.61<br>[14.9]  |
| T8                | 291.39<br>[9.5]  | 175.0<br>[10.2]  | 62.25<br>[9.9]   | 141.51<br>[9.9]  | 211.02<br>[29.4] | 255.65<br>[30.8] | -116.73<br>[17.6] | 156.40<br>[16.7] |
| T9                | 122.35<br>[31.9] | 184.18<br>[21.5] | 56.49<br>[12.6]  | 146.84<br>[8.6]  | 201.78<br>[11.8] | 285.70<br>[8.7]  | -137.67<br>[16.9] | 161.70<br>[13.5] |
| T10               | 279.48<br>[11.0] | 174.19<br>[11.3] | 46.60<br>[17.7]  | 127.15<br>[18.2] | 187.85<br>[11.2] | 274.81<br>[10.5] | -109.24<br>[16.5] | 135.49<br>[27.6] |
| A11               | 285.95<br>[10.9] | 171.38<br>[9.7]  | 54.08<br>[8.8]   | 104.06<br>[26.8] | 195.83<br>[11.2] | 275.77<br>[10.4] | -121.30<br>[14.5] | 85.32<br>[35.2]  |
| C <sup>+</sup> 12 | 298.31<br>[10.4] | 180.33<br>[9.9]  | 66.73<br>[10.3]  | 115.58<br>[24.4] | 193.94<br>[13.1] | 261.79<br>[19.5] | -116.53<br>[15.6] | 101.53<br>[38.5] |
| C <sup>+</sup> 13 | 297.38<br>[15.3] | 182.67<br>[11.7] | 56.49<br>[12.6]  | 126.90<br>[17.3] | 214.86<br>[30.2] | 222.81<br>[28.8] | -106.94<br>[11.5] | 131.48<br>[32.4] |
| T14               | 59.28<br>[14.3]  | 172.06<br>[18.3] | 289.35<br>[17.4] | 147.60<br>[11.2] | 213.24<br>[18.5] | 172.73<br>[15.1] | 62.92<br>[12.3]   | 158.90<br>[15.0] |
| T15               | 68.28<br>[13.1]  | 200.86<br>[21.0] | 55.57<br>[10.2]  | 136.71<br>[11.0] | 219.95<br>[24.8] | 45.73<br>[13.7]  | -126.65<br>[21.8] | 151.39<br>[20.2] |
| T16               | 74.60<br>[11.9]  | 179.60<br>[14.5] | 301.43<br>[9.1]  | 83.05<br>[12.0]  | 188.78<br>[10.0] | 269.89<br>[8.8]  | -129.73<br>[9.5]  | 38.06<br>[24.5]  |
| C <sup>+</sup> 17 | 304.72<br>[10.3] | 180.11<br>[9.4]  | 73.49<br>[9.2]   | 135.09<br>[20.6] | 195.11<br>[14.4] | 256.00<br>[21.2] | -110.25<br>[13.5] | 164.42<br>[24.5] |
| C <sup>+</sup> 18 | 289.52<br>[24.3] | 181.62<br>[23.5] | 66.92<br>[29.6]  | 129.90<br>[18.1] | 0.00<br>[0.0]    | 0.00<br>[0.0]    | -102.23<br>[15.4] | 136.48<br>[27.1] |

Table S6: Average value along with standard deviation of the base pair parameters as found in MD simulation of 5'E-form structure in deprotonated state with normal cytosines.

| System                                           | Base pair | Shear<br>(Å)   | Stagger<br>(Å) | Stretch<br>(Å) | Buckle<br>(°)    | Open<br>(°)      | Propeller<br>(°) |
|--------------------------------------------------|-----------|----------------|----------------|----------------|------------------|------------------|------------------|
| 5'E-form<br>structure with<br>normal<br>cytosine | C1:C13    | 6.50<br>[1.5]  | -1.47<br>[1.9] | 3.92<br>[2.3]  | -55.86<br>[15.7] | -30.62<br>[19.3] | 12.66<br>[15.5]  |
|                                                  | C2:C14    | 1.99<br>[2.4]  | -0.35<br>[1.8] | 3.70<br>[1.2]  | 17.30<br>[37.2]  | 30.90<br>[24.5]  | 40.21<br>[20.0]  |
|                                                  | C3:C15    | 2.46<br>[0.4]  | 2.40<br>[0.7]  | 2.88<br>[0.7]  | 53.26<br>[14.0]  | -40.98<br>[10.3] | 74.92<br>[9.0]   |
|                                                  | C7:C19    | -2.35<br>[0.8] | 6.13<br>[0.7]  | 5.44<br>[0.7]  | -31.45<br>[11.8] | -13.84<br>[8.3]  | -30.43<br>[8.1]  |
|                                                  | C8:C20    | -2.47<br>[1.1] | 9.25<br>[1.0]  | 1.52<br>[1.3]  | 36.62<br>[20.6]  | 48.27<br>[10.9]  | 2.95<br>[13.5]   |
|                                                  | C9:C21    | 0.26<br>[1.4]  | 0.78<br>[1.7]  | 3.13<br>[0.9]  | 47.57<br>[30.8]  | 17.88<br>[25.5]  | 67.98<br>[44.1]  |

Table S7: Average value along with standard deviation of the backbone dihedral angles for the bases as found in MD simulation of 5'E-form structure in deprotonated state with normal cytosines.

| Nucleotide | $\alpha$ (°)     | $\beta$ (°)      | $\gamma$ (°)    | $\delta$ (°)     | $\varepsilon$ (°) | $\zeta$ (°)      | $\chi$ (°)        | Phase (°)        |
|------------|------------------|------------------|-----------------|------------------|-------------------|------------------|-------------------|------------------|
| C1         | 0.00<br>[0.0]    | 0.00<br>[0.0]    | 63.69<br>[19.4] | 79.84<br>[7.3]   | 211.00<br>[17.3]  | 277.02<br>[12.1] | -133.11<br>[15.0] | 29.72<br>[15.2]  |
| C2         | 290.06<br>[13.0] | 192.02<br>[9.9]  | 59.17<br>[11.1] | 85.88<br>[9.1]   | 225.28<br>[11.8]  | 294.27<br>[9.3]  | -131.08<br>[16.4] | 53.46<br>[18.3]  |
| C3         | 296.83<br>[10.0] | 196.61<br>[9.8]  | 63.57<br>[9.9]  | 139.20<br>[7.8]  | 233.00<br>[14.1]  | 280.10<br>[12.1] | -71.12<br>[7.6]   | 146.80<br>[10.9] |
| T4         | 94.13<br>[20.2]  | 184.43<br>[12.4] | 62.38<br>[8.9]  | 143.84<br>[7.0]  | 193.17<br>[7.9]   | 278.78<br>[6.9]  | -121.52<br>[12.4] | 159.68<br>[11.8] |
| A5         | 292.94<br>[8.1]  | 169.94<br>[8.3]  | 54.00<br>[7.6]  | 141.97<br>[7.0]  | 222.32<br>[11.3]  | 293.27<br>[9.7]  | -90.40<br>[13.1]  | 152.10<br>[10.7] |
| A6         | 184.86<br>[18.4] | 183.22<br>[11.1] | 57.45<br>[13.9] | 148.53<br>[6.8]  | 193.86<br>[8.3]   | 274.02<br>[7.6]  | -156.84<br>[11.6] | 191.30<br>[14.5] |
| C7         | 291.57<br>[9.3]  | 172.95<br>[8.8]  | 57.89<br>[7.9]  | 82.43<br>[6.6]   | 216.61<br>[11.5]  | 283.14<br>[8.4]  | -135.63<br>[9.2]  | 21.18<br>[11.4]  |
| C8         | 295.29<br>[15.7] | 193.91<br>[14.2] | 59.25<br>[11.4] | 84.01<br>[17.5]  | 196.14<br>[13.7]  | 268.37<br>[20.7] | -94.58<br>[11.8]  | 62.35<br>[27.8]  |
| C9         | 284.37<br>[14.8] | 185.57<br>[10.4] | 55.06<br>[9.1]  | 84.63<br>[7.7]   | 218.23<br>[15.6]  | 281.98<br>[20.9] | -132.35<br>[14.5] | 24.25<br>[12.4]  |
| T10        | 89.53<br>[9.8]   | 185.03<br>[29.2] | 291.47<br>[8.7] | 135.13<br>[11.3] | 227.87<br>[21.1]  | 161.25<br>[13.8] | -119.65<br>[17.3] | 146.62<br>[17.2] |
| A11        | 81.90<br>[17.1]  | 182.79<br>[15.1] | 62.13<br>[10.9] | 141.67<br>[11.8] | 201.09<br>[14.0]  | 274.19<br>[17.0] | 140.93<br>[19.8]  | 155.45<br>[26.5] |
| A12        | 197.76<br>[17.5] | 168.74<br>[13.6] | 61.38<br>[10.7] | 151.05<br>[6.4]  | 223.60<br>[11.4]  | 288.20<br>[8.6]  | -145.67<br>[21.5] | 178.26<br>[13.7] |
| C13        | 288.96<br>[9.0]  | 174.60<br>[9.1]  | 59.74<br>[7.3]  | 144.02<br>[8.9]  | 232.71<br>[17.4]  | 288.64<br>[9.9]  | -129.29<br>[13.6] | 163.73<br>[19.9] |
| C14        | 279.43<br>[13.4] | 177.84<br>[10.7] | 53.58<br>[10.3] | 140.60<br>[8.2]  | 209.13<br>[23.3]  | 216.95<br>[57.4] | -121.94<br>[26.4] | 159.64<br>[14.8] |
| C15        | 279.38<br>[22.8] | 221.30<br>[40.4] | 55.43<br>[12.0] | 147.24<br>[10.2] | 232.72<br>[15.4]  | 294.03<br>[12.0] | -140.38<br>[16.2] | 159.27<br>[15.2] |
| T16        | 236.44<br>[60.7] | 184.11<br>[13.9] | 53.52<br>[11.3] | 145.98<br>[8.6]  | 200.98<br>[11.8]  | 283.64<br>[7.7]  | -132.40<br>[14.8] | 160.93<br>[13.5] |
| A17        | 282.86<br>[10.8] | 169.85<br>[8.2]  | 46.28<br>[9.4]  | 141.74<br>[8.9]  | 231.10<br>[24.1]  | 188.81<br>[23.9] | -92.06<br>[14.2]  | 148.46<br>[11.0] |
| A18        | 286.44<br>[12.3] | 152.39<br>[15.3] | 52.95<br>[10.5] | 142.96<br>[9.2]  | 185.88<br>[9.5]   | 270.83<br>[8.6]  | -112.60<br>[11.9] | 170.30<br>[21.7] |
| C19        | 291.24<br>[10.0] | 168.87<br>[8.5]  | 57.39<br>[8.6]  | 131.14<br>[14.9] | 219.56<br>[10.6]  | 288.42<br>[9.3]  | -107.65<br>[12.0] | 136.21<br>[22.8] |
| C20        | 285.97<br>[10.5] | 172.68<br>[10.1] | 59.71<br>[8.2]  | 145.59<br>[8.7]  | 210.28<br>[23.5]  | 162.90<br>[10.8] | -112.82<br>[17.4] | 166.53<br>[17.5] |
| C21        | 257.27<br>[36.0] | 162.32<br>[18.1] | 50.0<br>[11.0]  | 143.13<br>[11.9] | 219.45<br>[24.9]  | 152.12<br>[15.8] | -136.73<br>[17.0] | 162.91<br>[24.6] |
| T22        | 235.44<br>[85.2] | 182.70<br>[17.7] | 60.03<br>[11.0] | 146.33<br>[11.7] | 0.00<br>[0.0]     | 0.00<br>[0.0]    | -135.94<br>[20.6] | 168.70<br>[23.6] |

Table S8: Average hydrogen bonding geometry and occupancy (considering C – O distance  $\leq 3.4$  Å and C-H...O angle  $> 120^\circ$ ) of possible C-H...O mediated hydrogen bond between sugar moieties of the antiparallel strands along the narrow grooves of i-motif DNA.

| Structure   | C-H...O mediated hydrogen bond between sugar moiety | Distance between C and O (Å) | C-H...O angle ( $^\circ$ ) | Occupancy (%) |
|-------------|-----------------------------------------------------|------------------------------|----------------------------|---------------|
| 5'E i-motif | (C1) C1'-H...O4' (T22)                              | 3.30                         | 138.03                     | 51.33         |
|             | (T22) C1'-H...O4' (C1)                              | 3.32                         | 137.86                     | 32.24         |
|             | (C2) C1'-H...O4' (C21)                              | 3.27                         | 132.14                     | 71.00         |
|             | (C21) C1'-H...O4' (C2)                              | 3.26                         | 131.71                     | 72.11         |
|             | (C3) C1'-H...O4' (C20)                              | 3.29                         | 131.07                     | 55.74         |
|             | (C20) C1'-H...O4' (C3)                              | 3.25                         | 131.16                     | 70.29         |
|             | (C <sup>+</sup> 8) C1'-H...O4' (C <sup>+</sup> 15)  | 3.29                         | 136.34                     | 65.10         |
|             | (C <sup>+</sup> 15) C1'-H...O4' (C <sup>+</sup> 8)  | 3.36                         | 131.12                     | 18.31         |
|             | (C <sup>+</sup> 9) C1'-H...O4' (C <sup>+</sup> 14)  | 3.29                         | 131.14                     | 47.22         |
|             | (C <sup>+</sup> 14) C1'-H...O4' (C <sup>+</sup> 9)  | 3.30                         | 130.74                     | 43.15         |
|             | (T10) C1'-H...O4' (C <sup>+</sup> 13)               | 3.38                         | 126.16                     | 10.0          |
|             | (C <sup>+</sup> 13) C1'-H...O4' (T10)               | 3.30                         | 149.18                     | 82.10         |
| 3'E i-motif | (C1) C1'-H...O4' (C7)                               | 3.27                         | 134.46                     | 56.75         |
|             | (C7) C1'-H...O4' (C1)                               | 3.31                         | 130.51                     | 17.70         |
|             | (C2) C1'-H...O4' (C6)                               | 3.29                         | 135.51                     | 64.64         |
|             | (C6) C1'-H...O4' (C2)                               | 3.28                         | 133.41                     | 67.24         |
|             | (C <sup>+</sup> 12) C1'-H...O4' (C <sup>+</sup> 18) | 3.30                         | 139.27                     | 51.27         |
|             | (C <sup>+</sup> 18) C1'-H...O4' (C <sup>+</sup> 12) | 3.32                         | 134.16                     | 23.59         |
|             | (C <sup>+</sup> 13) C1'-H...O4' (C <sup>+</sup> 17) | 3.29                         | 133.26                     | 54.27         |
|             | (C <sup>+</sup> 17) C1'-H...O4' (C <sup>+</sup> 13) | 3.31                         | 131.11                     | 37.35         |

Table S9: Base pairing and stacking energy between the stacked base pairs in model C<sup>+</sup>C<sup>+</sup>C<sup>+</sup>/CCC trinucleotide structure (ABC/DEF) as derived from the NMR structure of i-motif DNA (PDB id: 1EL2).

| System                                                                                                  | Quantum chemical method | Base pairing energy (kcal/mol) |        |        | Stacking energy between consecutive base pairs (kcal/mol) |        | Stacking energy between the stacked base pairs in trinucleotide step [ABC/DEF – (A:F + B:E + C:D)] (kcal/mol) |
|---------------------------------------------------------------------------------------------------------|-------------------------|--------------------------------|--------|--------|-----------------------------------------------------------|--------|---------------------------------------------------------------------------------------------------------------|
|                                                                                                         |                         | A:F                            | B:E    | C:D    | AB/EF                                                     | BC/DE  |                                                                                                               |
| Partial optimized geometry of C <sup>+</sup> C <sup>+</sup> C <sup>+</sup> /CCC trinucleotide structure | ωB97X-D/cc-pVDZ         | -55.51                         | -54.50 | -50.31 | 28.93                                                     | 27.77  | 91.18                                                                                                         |
|                                                                                                         | B3LYP-D3/cc-pVDZ        | -57.06                         | -55.97 | -51.49 | 26.64                                                     | 25.80  | 87.09                                                                                                         |
|                                                                                                         | MO6-2X/cc-pVDZ          | -53.92                         | -53.86 | -49.53 | 28.16                                                     | 28.22  | 90.75                                                                                                         |
| Full optimized geometry of C <sup>+</sup> C <sup>+</sup> C <sup>+</sup> /CCC trinucleotide structure    | ωB97X-D/cc-pVDZ         | -57.59                         | -59.01 | -58.04 | 20.77                                                     | 17.64  | 70.56                                                                                                         |
|                                                                                                         | B3LYP-D3/cc-pVDZ        | -56.09                         | -57.50 | -56.57 | 22.48                                                     | 21.74  | 75.02                                                                                                         |
|                                                                                                         | MO6-2X/cc-pVDZ          | -54.62                         | -55.96 | -54.98 | 22.09                                                     | 20.94  | 73.91                                                                                                         |
| Full optimized geometry of CCC/CCC trinucleotide structure                                              | ωB97X-D/cc-pVDZ         | -28.80                         | -28.48 | -28.06 | -24.66                                                    | -34.72 | -61.04                                                                                                        |
|                                                                                                         | B3LYP-D3/cc-pVDZ        | -27.74                         | -27.43 | -27.04 | -21.82                                                    | -30.17 | -53.49                                                                                                        |
|                                                                                                         | MO6-2X/cc-pVDZ          | -26.42                         | -26.17 | -25.80 | -23.83                                                    | -31.55 | -56.71                                                                                                        |

Table S10: Variation of stacking energy between the stacked base pairs in model C<sup>+</sup>C<sup>+</sup>C<sup>+</sup>/CCC trinucleotide structure (ABC/DEF) with stacking interval between the consecutive base pairs.

| Stacking interval between consecutive base pairs (Å) | ωB97X-D/cc-pVDZ                                           |         |                                                                                 | B3LYP-D3/cc-pVDZ                                          |         |                                                                                 | MO6-2X/cc-pVDZ                                            |         |                                                                                 |
|------------------------------------------------------|-----------------------------------------------------------|---------|---------------------------------------------------------------------------------|-----------------------------------------------------------|---------|---------------------------------------------------------------------------------|-----------------------------------------------------------|---------|---------------------------------------------------------------------------------|
|                                                      | Stacking energy between consecutive base pairs (kcal/mol) |         | Stacking energy between the stacked base pairs in trinucleotide step (kcal/mol) | Stacking energy between consecutive base pairs (kcal/mol) |         | Stacking energy between the stacked base pairs in trinucleotide step (kcal/mol) | Stacking energy between consecutive base pairs (kcal/mol) |         | Stacking energy between the stacked base pairs in trinucleotide step (kcal/mol) |
|                                                      | AB/EF                                                     | BC/DE   |                                                                                 | AB/EF                                                     | BC/DE   |                                                                                 | AB/EF                                                     | BC/DE   |                                                                                 |
| (1.98, 4.20)                                         | 868.255                                                   | 38.606  | 941.101                                                                         | 865.115                                                   | 37.606  | 937.884                                                                         | 861.514                                                   | 39.372  | 934.973                                                                         |
| (2.18, 4.00)                                         | 496.518                                                   | 38.453  | 569.747                                                                         | 493.990                                                   | 37.993  | 566.989                                                                         | 486.713                                                   | 39.219  | 560.861                                                                         |
| (2.38, 3.80)                                         | 291.921                                                   | 36.538  | 363.848                                                                         | 289.163                                                   | 35.849  | 360.630                                                                         | 281.197                                                   | 37.840  | 354.349                                                                         |
| (2.58, 3.60)                                         | 166.604                                                   | 34.546  | 236.999                                                                         | 163.923                                                   | 33.474  | 233.628                                                                         | 156.799                                                   | 36.308  | 228.879                                                                         |
| (2.78, 3.40)                                         | 93.988                                                    | 32.248  | 162.391                                                                         | 91.613                                                    | 31.099  | 159.021                                                                         | 85.945                                                    | 34.010  | 156.263                                                                         |
| (2.98, 3.20)                                         | 55.918                                                    | 30.257  | 122.100                                                                         | 53.237                                                    | 28.495  | 118.116                                                                         | 49.943                                                    | 31.789  | 118.270                                                                         |
| (3.18, 3.00)                                         | 37.074                                                    | 27.959  | 101.265                                                                         | 34.546                                                    | 26.044  | 97.128                                                                          | 34.087                                                    | 29.414  | 99.733                                                                          |
| (3.38, 2.80)                                         | 29.49                                                     | 26.886  | 92.685                                                                          | 27.116                                                    | 24.742  | 88.396                                                                          | 28.342                                                    | 26.886  | 91.919                                                                          |
| (3.58, 2.60)                                         | 27.346                                                    | 29.108  | 92.839                                                                          | 25.201                                                    | 26.657  | 88.549                                                                          | 27.806                                                    | 27.576  | 92.073                                                                          |
| (3.78, 2.40)                                         | 27.959                                                    | 37.917  | 102.337                                                                         | 26.274                                                    | 35.466  | 98.201                                                                          | 29.338                                                    | 34.163  | 100.039                                                                         |
| (3.98, 2.20)                                         | 29.644                                                    | 59.211  | 125.164                                                                         | 28.265                                                    | 56.530  | 121.180                                                                         | 31.406                                                    | 52.624  | 120.414                                                                         |
| (4.18, 2.00)                                         | 31.482                                                    | 101.877 | 169.591                                                                         | 30.333                                                    | 99.196  | 165.914                                                                         | 33.091                                                    | 92.915  | 162.391                                                                         |
| (4.38, 1.80)                                         | 33.397                                                    | 180.315 | 249.561                                                                         | 32.478                                                    | 177.941 | 246.497                                                                         | 34.700                                                    | 169.898 | 240.522                                                                         |
| (4.58, 1.60)                                         | 34.929                                                    | 315.207 | 385.755                                                                         | 34.546                                                    | 314.594 | 384.836                                                                         | 36.078                                                    | 304.943 | 376.410                                                                         |
| (4.78, 1.40)                                         | 35.849                                                    | 537.345 | 608.813                                                                         | 35.849                                                    | 540.409 | 611.724                                                                         | 36.921                                                    | 527.694 | 600.080                                                                         |

Table S11: Average hydrogen bonding geometry and occupancy (considering C – O distance  $\leq 3.4$  Å and C-H...O angle  $> 120^\circ$ ) of possible C-H...O mediated hydrogen bond between sugar moieties of the antiparallel strands along the narrow grooves of i-motif DNA at elevated temperatures.

| C-H...O mediated hydrogen bond between sugar moiety | 320K                         |                            |               | 340K                         |                            |               |
|-----------------------------------------------------|------------------------------|----------------------------|---------------|------------------------------|----------------------------|---------------|
|                                                     | Distance between C and O (Å) | C-H...O angle ( $^\circ$ ) | Occupancy (%) | Distance between C and O (Å) | C-H...O angle ( $^\circ$ ) | Occupancy (%) |
| 5'E i-motif                                         |                              |                            |               |                              |                            |               |
| (C1) C1'-H...O4' (T22)                              | 3.29                         | 136.72                     | 42.21         | 3.31                         | 137.44                     | 14.41         |
| (T22) C1'-H...O4' (C1)                              | 3.32                         | 139.89                     | 30.51         | 3.32                         | 139.76                     | 10.27         |
| (C2) C1'-H...O4' (C21)                              | 3.26                         | 131.68                     | 68.21         | 3.26                         | 132.98                     | 69.01         |
| (C21) C1'-H...O4' (C2)                              | 3.26                         | 131.10                     | 66.51         | 3.27                         | 131.76                     | 60.13         |
| (C3) C1'-H...O4' (C20)                              | 3.30                         | 129.49                     | 40.40         | 3.29                         | 130.16                     | 42.93         |
| (C20) C1'-H...O4' (C3)                              | 3.25                         | 130.55                     | 64.22         | 3.25                         | 131.10                     | 63.16         |
| (C <sup>+</sup> 8) C1'-H...O4' (C <sup>+</sup> 15)  | 3.29                         | 134.92                     | 56.72         | 3.29                         | 134.43                     | 56.15         |
| (C <sup>+</sup> 15) C1'-H...O4' (C <sup>+</sup> 8)  | 3.34                         | 130.00                     | 10.82         | 3.33                         | 129.85                     | 12.40         |
| (C <sup>+</sup> 9) C1'-H...O4' (C <sup>+</sup> 14)  | 3.29                         | 131.52                     | 43.10         | 3.29                         | 131.45                     | 31.57         |
| (C <sup>+</sup> 14) C1'-H...O4' (C <sup>+</sup> 9)  | 3.30                         | 133.58                     | 38.51         | 3.30                         | 134.83                     | 44.39         |
| (T10) C1'-H...O4' (C <sup>+</sup> 13)               | 3.35                         | 131.72                     | 1.90          | 3.35                         | 131.78                     | 18.46         |
| (C <sup>+</sup> 13) C1'-H...O4' (T10)               | 3.28                         | 141.63                     | 66.12         | 3.28                         | 134.52                     | 40.93         |
| 3'E i-motif                                         |                              |                            |               |                              |                            |               |
| (C1) C1'-H...O4' (C7)                               | 3.23                         | 130.04                     | 52.25         | 3.24                         | 135.30                     | 65.52         |
| (C7) C1'-H...O4' (C1)                               | 3.34                         | 128.42                     | 2.6           | 3.33                         | 128.31                     | 1.31          |
| (C2) C1'-H...O4' (C6)                               | 3.34                         | 136.84                     | 2.50          | 3.35                         | 132.10                     | 6.36          |
| (C6) C1'-H...O4' (C2)                               | 3.28                         | 142.69                     | 54.44         | 3.26                         | 137.69                     | 64.15         |
| (C <sup>+</sup> 12) C1'-H...O4' (C <sup>+</sup> 18) | 3.29                         | 140.66                     | 62.18         | 3.25                         | 132.88                     | 57.59         |
| (C <sup>+</sup> 18) C1'-H...O4' (C <sup>+</sup> 12) | 3.37                         | 131.88                     | 2.31          | 3.33                         | 130.74                     | 3.39          |
| (C <sup>+</sup> 13) C1'-H...O4' (C <sup>+</sup> 17) | 3.32                         | 129.03                     | 19.63         | 3.30                         | 130.81                     | 1.48          |
| (C <sup>+</sup> 17) C1'-H...O4' (C <sup>+</sup> 13) | 3.27                         | 138.40                     | 61.20         | 3.30                         | 150.97                     | 61.18         |

Table S12: Average value along with standard deviation of the base pair step parameters as found in MD simulation of 5'E<sub>GCC</sub> and 5'E<sub>CGG</sub> form structure (‘:’ denotes base pair and ‘::’ denotes base pairs stack).

| System                                            | Base pair step                                      | Shift (Å)       | Slide (Å)       | Rise (Å)       | Tilt (°)        | Roll (°)        | Twist (°)       |
|---------------------------------------------------|-----------------------------------------------------|-----------------|-----------------|----------------|-----------------|-----------------|-----------------|
| 5'E <sub>GCC</sub> -form structure (5'E topology) | CC/C <sup>+</sup> C <sup>+</sup><br>(1:13 :: 2:14)  | 0.33<br>[0.44]  | 0.16<br>[0.42]  | 6.19<br>[0.23] | 1.33<br>[3.11]  | -1.01<br>[4.18] | 18.13<br>[4.02] |
|                                                   | CC/C <sup>+</sup> C <sup>+</sup><br>(2:14 :: 3:15)  | 0.50<br>[0.47]  | 0.20<br>[0.45]  | 6.34<br>[0.24] | 1.04<br>[3.93]  | -1.64<br>[3.56] | 16.61<br>[4.98] |
|                                                   | C <sup>+</sup> C <sup>+</sup> /CC<br>(7:19 :: 8:20) | -0.57<br>[0.43] | -0.84<br>[0.39] | 6.04<br>[0.20] | 3.04<br>2.77]   | -2.28<br>[4.39] | 17.28<br>[3.24] |
|                                                   | C <sup>+</sup> C <sup>+</sup> /CC<br>(8:20 :: 9:21) | -0.34<br>[0.47] | -0.25<br>[0.44] | 6.31<br>[0.24] | 0.14<br>[3.71]  | -1.26<br>[3.81] | 17.90<br>[4.31] |
| 5'E <sub>CGG</sub> -form structure (5'E topology) | CC/C <sup>+</sup> C <sup>+</sup><br>(1:13 :: 2:14)  | 0.26<br>[0.41]  | 0.03<br>[0.40]  | 6.13<br>[0.21] | 0.64<br>[3.14]  | -0.93<br>[3.82] | 19.63<br>[3.79] |
|                                                   | CC/C <sup>+</sup> C <sup>+</sup><br>(2:14 :: 3:15)  | 0.28<br>[0.43]  | 0.16<br>[0.36]  | 6.39<br>[0.24] | -0.06<br>[3.58] | 0.17<br>[3.51]  | 19.10<br>[3.92] |
|                                                   | C <sup>+</sup> C <sup>+</sup> /CC<br>(7:19 :: 8:20) | -0.23<br>[0.40] | -0.27<br>[0.37] | 6.13<br>[0.21] | 2.80<br>[2.93]  | -3.38<br>[4.04] | 14.98<br>[3.01] |
|                                                   | C <sup>+</sup> C <sup>+</sup> /CC<br>(8:20 :: 9:21) | -0.26<br>[0.44] | -0.04<br>[0.35] | 6.19<br>[0.21] | -0.45<br>[3.14] | -0.26<br>[3.56] | 18.73<br>[3.49] |

Table S13: Average value along with standard deviation of stacking interval and twist between consecutive stacked base pair within i-motif core as found in MD simulation of 5'E<sub>GCC</sub> and 5'E<sub>CGG</sub>-form structure (‘.’ denotes base pair and ‘::’ denotes base pairs stack).

| System                                               | Base pair step                                     | Stacking interval (Å) | Twist between consecutive stacked base pair (°) |
|------------------------------------------------------|----------------------------------------------------|-----------------------|-------------------------------------------------|
| 5'E <sub>GCC</sub> -form structure<br>(5'E topology) | CC <sup>+</sup> /CC <sup>+</sup><br>(1:13 :: 9:21) | 3.44<br>[0.24]        | 113.80<br>[3.94]                                |
|                                                      | CC <sup>+</sup> /CC <sup>+</sup><br>(21:9 :: 14:2) | 2.74<br>[0.22]        | 84.25<br>[3.06]                                 |
|                                                      | CC <sup>+</sup> /CC <sup>+</sup><br>(2:14 :: 8:20) | 3.56<br>[0.23]        | 113.64<br>[5.09]                                |
|                                                      | CC <sup>+</sup> /CC <sup>+</sup><br>(20:8 :: 15:3) | 2.77<br>[0.23]        | 82.98<br>[3.74]                                 |
|                                                      | CC <sup>+</sup> /CC <sup>+</sup><br>(3:15 :: 7:19) | 3.24<br>[0.26]        | 114.16<br>[4.42]                                |
| 5'E <sub>CGG</sub> -form structure<br>(5'E topology) | CC <sup>+</sup> /CC <sup>+</sup><br>(1:13 :: 9:21) | 3.40<br>[0.24]        | 114.10<br>[4.44]                                |
|                                                      | CC <sup>+</sup> /CC <sup>+</sup><br>(21:9 :: 14:2) | 2.72<br>[0.24]        | 85.48<br>[2.95]                                 |
|                                                      | CC <sup>+</sup> /CC <sup>+</sup><br>(2:14 :: 8:20) | 3.45<br>[0.24]        | 113.23<br>[4.21]                                |
|                                                      | CC <sup>+</sup> /CC <sup>+</sup><br>(20:8 :: 15:3) | 2.93<br>[0.24]        | 85.88<br>[2.89]                                 |
|                                                      | CC <sup>+</sup> /CC <sup>+</sup><br>(3:15 :: 7:19) | 3.18<br>[0.25]        | 108.98<br>[3.39]                                |

Table S14: Average value along with standard deviation of the backbone dihedral angles for the bases as found in MD simulation of 5'E<sub>GCC</sub>-form structure.

| Nucleotide        | $\alpha$ (°)      | $\beta$ (°)      | $\gamma$ (°)     | $\delta$ (°)     | $\varepsilon$ (°) | $\zeta$ (°)      | $\chi$ (°)        | Phase (°)         |
|-------------------|-------------------|------------------|------------------|------------------|-------------------|------------------|-------------------|-------------------|
| C1                | 0.00<br>[0.0]     | 0.00<br>[0.0]    | 66.0<br>[26.2]   | 95.53<br>[25.1]  | 213.31<br>[23.9]  | 279.34<br>[11.1] | -133.15<br>[14.0] | 70.10<br>[49.1]   |
| C2                | 288.98<br>[22.5]  | 189.75<br>[9.8]  | 80.98<br>[18.3]  | 90.15<br>[17.2]  | 193.67<br>[14.9]  | 279.83<br>[9.7]  | -124.17<br>[10.8] | 57.91<br>[38.3]   |
| C3                | 281.07<br>[38.1]  | 173.10<br>[23.8] | 89.2<br>[36.0]   | 112.06<br>[26.4] | 231.27<br>[19.0]  | 289.54<br>[11.3] | -116.30<br>[11.8] | 106.49<br>[43.3]  |
| G4                | 143.68<br>[834.2] | 180.69<br>[16.8] | 63.52<br>[32.6]  | 147.14<br>[9.3]  | 188.56<br>[15.9]  | 262.69<br>[17.5] | -129.41<br>[20.6] | 167.20<br>[15.3]  |
| C5                | 288.31<br>[10.8]  | 188.98<br>[14.8] | 50.48<br>[11.6]  | 139.51<br>[8.6]  | 250.08<br>[18.7]  | 278.24<br>[12.1] | -130.11<br>[17.6] | 155.67<br>[15.7]  |
| C6                | 216.32<br>[38.7]  | 168.62<br>[21.4] | 56.26<br>[12.6]  | 145.97<br>[7.9]  | 210.65<br>[16.1]  | 283.23<br>[10.0] | -128.23<br>[15.7] | 164.96<br>[13.8]  |
| C <sup>+</sup> 7  | 288.74<br>[9.8]   | 171.30<br>[10.2] | 60.05<br>[7.6]   | 85.13<br>[9.0]   | 192.09<br>[11.3]  | 273.02<br>[10.8] | -143.12<br>[9.3]  | 37.97<br>[46.0]   |
| C <sup>+</sup> 8  | 300.43<br>[10.6]  | 183.55<br>[10.6] | 71.27<br>[9.5]   | 118.10<br>[26.6] | 193.88<br>[11.6]  | 268.44<br>[17.6] | -120.63<br>[13.9] | 110.45<br>[41.7]  |
| C <sup>+</sup> 9  | 292.20<br>[24.2]  | 178.62<br>[16.1] | 78.54<br>[31.7]  | 130.48<br>[16.8] | 250.35<br>[34.7]  | 218.67<br>[31.7] | -106.51<br>[14.5] | 138.43<br>[24.6]  |
| G10               | 287.22<br>[12.1]  | 154.81<br>[24.3] | 57.63<br>[10.7]  | 145.55<br>[7.7]  | 183.18<br>[11.9]  | 273.02<br>[9.6]  | -103.73<br>[11.6] | 167.30<br>[15.3]  |
| C11               | 291.04<br>[13.6]  | 168.71<br>[11.2] | 64.30<br>[9.3]   | 139.36<br>[13.8] | 276.44<br>[20.9]  | 73.73<br>[14.7]  | -126.13<br>[21.7] | 148.58<br>[18.2]  |
| C12               | 72.08<br>[11.8]   | 190.97<br>[15.5] | 298.22<br>[8.9]  | 151.95<br>[8.8]  | 233.14<br>[32.0]  | 139.13<br>[24.2] | -147.31<br>[16.9] | 172.33<br>[17.0]  |
| C <sup>+</sup> 13 | 272.31<br>[22.9]  | 144.42<br>[24.5] | 55.23<br>[9.4]   | 86.20<br>[7.9]   | 195.25<br>[9.6]   | 273.39<br>[8.9]  | -136.18<br>[8.1]  | 42.89<br>[41.0]   |
| C <sup>+</sup> 14 | 299.26<br>[13.1]  | 178.87<br>[10.0] | 74.20<br>[12.6]  | 123.69<br>[26.3] | 197.67<br>[13.8]  | 270.65<br>[14.7] | -115.23<br>[12.8] | 131.54<br>[43.4]  |
| C <sup>+</sup> 15 | 279.17<br>[28.8]  | 185.59<br>[21.0] | 70.98<br>[31.7]  | 119.46<br>[19.8] | 242.43<br>[30.2]  | 258.86<br>[29.8] | -99.55<br>[8.3]   | 122.05<br>[45.8]  |
| G16               | 270.60<br>[34.4]  | 184.04<br>[16.5] | 108.45<br>[49.1] | 147.65<br>[14.2] | 208.20<br>[14.0]  | 275.48<br>[15.2] | 148.29<br>[15.6]  | 170.22<br>[27.6]  |
| C17               | 206.75<br>[25.0]  | 169.13<br>[16.2] | 59.24<br>[13.3]  | 149.73<br>[6.9]  | 229.73<br>[18.3]  | 291.35<br>[10.6] | -146.95<br>[21.3] | 170.94<br>[14.11] |
| C18               | 288.89<br>[14.1]  | 169.66<br>[12.1] | 69.09<br>[21.9]  | 145.76<br>[8.3]  | 225.13<br>[20.2]  | 177.02<br>[14.9] | -127.79<br>[14.8] | 162.24<br>[14.7]  |
| C19               | 201.42<br>[24.1]  | 188.35<br>[14.0] | 63.22<br>[13.2]  | 95.56<br>[7.3]   | 201.39<br>[9.8]   | 279.21<br>[7.9]  | -112.15<br>[8.8]  | 0.03<br>[20.2]    |
| C20               | 294.94<br>[10.5]  | 174.20<br>[8.8]  | 67.09<br>[9.4]   | 85.50<br>[7.0]   | 190.84<br>[8.8]   | 279.05<br>[8.1]  | -126.80<br>[7.9]  | 24.11<br>[14.2]   |
| C21               | 294.91<br>[21.8]  | 178.49<br>[8.6]  | 70.02<br>[15.3]  | 80.73<br>[7.9]   | 188.42<br>[14.5]  | 278.05<br>[10.9] | -124.87<br>[8.7]  | 33.13<br>[17.3]   |
| G22               | 297.2<br>[12.7]   | 193.79<br>[11.0] | 63.88<br>[15.9]  | 132.07<br>[19.8] | 0.00<br>[0.0]     | 0.00<br>[0.0]    | -110.18<br>[20.8] | 111.31<br>[45.4]  |

Table S15: Average value along with standard deviation of the backbone dihedral angles for the bases as found in MD simulation of 5'E<sub>CGG</sub>-form structure.

| Nucleotide        | $\alpha$ (°)     | $\beta$ (°)      | $\gamma$ (°)     | $\delta$ (°)     | $\varepsilon$ (°) | $\zeta$ (°)      | $\chi$ (°)        | Phase (°)         |
|-------------------|------------------|------------------|------------------|------------------|-------------------|------------------|-------------------|-------------------|
| C1                | 0.00<br>[0.0]    | 0.00<br>[0.0]    | 64.26<br>[18.5]  | 82.62<br>[12.9]  | 197.20<br>[14.7]  | 275.79<br>[9.2]  | -128.75<br>[9.6]  | 39.71<br>[28.6]   |
| C2                | 294.77<br>[21.8] | 174.78<br>[15.8] | 69.60<br>[20.0]  | 85.12<br>[9.0]   | 191.20<br>[9.5]   | 280.59<br>[8.3]  | -126.83<br>[8.6]  | 33.74<br>[23.8]   |
| C3                | 297.42<br>[18.2] | 178.68<br>[8.9]  | 68.88<br>[13.8]  | 82.91<br>[11.7]  | 210.73<br>[22.8]  | 285.69<br>[11.1] | -121.63<br>[10.0] | 45.47<br>[21.7]   |
| C4                | 232.01<br>[41.5] | 253.94<br>[46.1] | 298.37<br>[10.9] | 150.75<br>[10.7] | 190.10<br>[8.1]   | 280.14<br>[8.3]  | -110.09<br>[13.9] | 166.21<br>[15.9]  |
| G5                | 288.90<br>[8.8]  | 168.11<br>[8.0]  | 56.84<br>[8.1]   | 141.40<br>[7.5]  | 270.94<br>[10.9]  | 283.46<br>[13.8] | -88.16<br>[11.3]  | 152.07<br>[11.6]  |
| G6                | 238.02<br>[47.0] | 179.07<br>[12.5] | 53.36<br>[11.9]  | 147.29<br>[9.3]  | 203.55<br>[13.9]  | 283.80<br>[9.9]  | -119.82<br>[36.4] | 164.22<br>[17.1]  |
| C <sup>+</sup> 7  | 290.34<br>[11.2] | 174.15<br>[10.3] | 63.41<br>[10.1]  | 83.28<br>[7.9]   | 189.59<br>[11.2]  | 271.10<br>[10.9] | -132.81<br>[10.5] | 28.53<br>[16.1]   |
| C <sup>+</sup> 8  | 298.52<br>[9.8]  | 177.46<br>[10.1] | 68.95<br>[8.5]   | 98.42<br>[19.5]  | 187.94<br>[9.8]   | 273.21<br>[12.1] | -124.53<br>[11.0] | 19.53<br>[14.3]   |
| C <sup>+</sup> 9  | 297.76<br>[16.3] | 180.69<br>[9.4]  | 72.79<br>[15.5]  | 116.60<br>[25.4] | 202.01<br>[22.0]  | 258.30<br>[29.7] | -113.96<br>[12.7] | 96.93<br>[21.7]   |
| C10               | 282.59<br>[30.2] | 137.65<br>[41.7] | 79.48<br>[39.8]  | 143.80<br>[11.6] | 210.43<br>[32.8]  | 259.22<br>[32.7] | -113.55<br>[15.2] | 158.37<br>[19.9]  |
| G11               | 291.82<br>[13.0] | 163.03<br>[16.7] | 55.72<br>[9.7]   | 143.0<br>[11.9]  | 251.41<br>[29.3]  | 138.10<br>[38.1] | 112.17<br>[34.6]  | 157.99<br>[19.5]  |
| G12               | 281.47<br>[11.2] | 70.77<br>[22.9]  | 186.41<br>[34.6] | 144.81<br>[11.0] | 221.09<br>[29.7]  | 155.29<br>[14.8] | -118.75<br>[29.7] | 159.39<br>[20.0]  |
| C <sup>+</sup> 13 | 285.71<br>[14.1] | 173.13<br>[13.4] | 59.02<br>[9.1]   | 102.27<br>[22.2] | 203.54<br>[26.3]  | 274.87<br>[13.3] | -131.33<br>[12.6] | 67.79<br>[34.0]   |
| C <sup>+</sup> 14 | 294.22<br>[18.3] | 188.67<br>[10.5] | 78.17<br>[19.4]  | 132.75<br>[16.4] | 199.11<br>[14.6]  | 260.67<br>[21.1] | -108.37<br>[15.6] | 141.30<br>[31.5]  |
| C <sup>+</sup> 15 | 287.32<br>[15.7] | 185.91<br>[15.2] | 66.33<br>[18.8]  | 124.36<br>[14.9] | 249.00<br>[24.1]  | 267.61<br>[20.2] | -92.26<br>[12.9]  | 128.33<br>[16.8]  |
| C16               | 107.07<br>[46.3] | 179.38<br>[18.1] | 57.29<br>[10.7]  | 145.56<br>[9.3]  | 220.74<br>[24.4]  | 283.61<br>[10.8] | -137.74<br>[21.5] | 157.64<br>[12.4]  |
| G17               | 264.64<br>[32.9] | 242.09<br>[48.3] | 299.86<br>[8.1]  | 139.77<br>[13.0] | 186.76<br>[10.9]  | 276.50<br>[8.9]  | 67.24<br>[16.0]   | 150.44<br>[16.0]  |
| G18               | 290.93<br>[8.8]  | 172.54<br>[8.8]  | 55.91<br>[8.3]   | 131.73<br>[11.0] | 246.64<br>[13.8]  | 289.63<br>[9.5]  | -95.42<br>[13.5]  | 142.04<br>[20.1]  |
| C19               | 263.23<br>[19.2] | 166.03<br>[14.1] | 53.66<br>[11.4]  | 87.94<br>[8.0]   | 195.76<br>[11.1]  | 275.22<br>[8.2]  | -114.10<br>[10.1] | 17.66<br>[19.4]   |
| C20               | 295.52<br>[9.7]  | 175.18<br>[9.0]  | 64.87<br>[8.2]   | 85.83<br>[7.5]   | 189.82<br>[8.6]   | 276.57<br>[7.9]  | -126.42<br>[8.2]  | 23.75<br>[16.0]   |
| C21               | 296.91<br>[15.7] | 176.10<br>[8.5]  | 70.35<br>[14.4]  | 83.18<br>[7.5]   | 189.92<br>[16.5]  | 277.60<br>[9.8]  | -127.70<br>[8.1]  | 29.91<br>[16.6]   |
| C22               | 293.59<br>[22.8] | 171.46<br>[33.0] | 75.90<br>[30.1]  | 116.38<br>[30.3] | 0.00<br>[0.0]     | 0.00<br>[0.0]    | -127.74<br>[12.6] | 100.08<br>[31.34] |

Table S16: Average hydrogen bonding geometry and occupancy (considering C – O distance  $\leq 3.4$  Å and C-H...O angle  $> 120^\circ$ ) of possible C-H...O mediated hydrogen bond between sugar moieties of the antiparallel strands along the narrow grooves of 5'E<sub>GCC</sub> and 5'E<sub>CGG</sub> i-motif DNA.

| C-H...O mediated hydrogen bond between sugar moiety | 5'E <sub>GCC</sub>           |                            |               | 5'E <sub>CGG</sub>           |                            |               |
|-----------------------------------------------------|------------------------------|----------------------------|---------------|------------------------------|----------------------------|---------------|
|                                                     | Distance between C and O (Å) | C-H...O angle ( $^\circ$ ) | Occupancy (%) | Distance between C and O (Å) | C-H...O angle ( $^\circ$ ) | Occupancy (%) |
| (C1) C1'-H...O4' (G22/C22)                          | 3.30                         | 134.89                     | 42.86         | 3.28                         | 133.52                     | 49.45         |
| (G22/C22) C1'-H...O4' (C1)                          | 3.31                         | 134.94                     | 7.84          | 3.28                         | 132.90                     | 26.22         |
| (C2) C1'-H...O4' (C21)                              | 3.27                         | 135.21                     | 69.27         | 3.26                         | 131.88                     | 70.43         |
| (C21) C1'-H...O4' (C2)                              | 3.28                         | 132.49                     | 61.74         | 3.26                         | 131.41                     | 71.02         |
| (C3) C1'-H...O4' (C20)                              | 3.34                         | 132.96                     | 38.49         | 3.29                         | 129.49                     | 53.03         |
| (C20) C1'-H...O4' (C3)                              | 3.28                         | 134.18                     | 69.72         | 3.24                         | 130.10                     | 66.84         |
| (C <sup>+</sup> 8) C1'-H...O4' (C <sup>+</sup> 15)  | 3.31                         | 133.96                     | 47.55         | 3.27                         | 133.85                     | 59.24         |
| (C <sup>+</sup> 15) C1'-H...O4' (C <sup>+</sup> 8)  | 3.32                         | 130.59                     | 21.71         | 3.34                         | 129.66                     | 9.94          |
| (C <sup>+</sup> 9) C1'-H...O4' (C <sup>+</sup> 14)  | 3.30                         | 133.26                     | 33.34         | 3.28                         | 131.32                     | 45.10         |
| (C <sup>+</sup> 14) C1'-H...O4' (C <sup>+</sup> 9)  | 3.28                         | 133.31                     | 55.57         | 3.31                         | 133.28                     | 36.16         |
| (G10/C10) C1'-H...O4' (C <sup>+</sup> 13)           | 3.39                         | 129.73                     | 7.21          | 3.34                         | 130.08                     | 10.10         |
| (C <sup>+</sup> 13) C1'-H...O4' (G10/C10)           | 3.26                         | 132.86                     | 39.52         | 3.24                         | 139.96                     | 66.63         |

## Figures:

Fig. S1: Variation of RMSD with respect to the initial energy minimized structure in case of studied i-motif systems: (a) 3'E-form structure with hemi-protonated cytosines and normal cytosines at 300K, (b) 3'E-form structure with hemi-protonated cytosines at elevated temperatures, (c) 5'E-form structure with hemi-protonated cytosines and normal cytosines at 300K, (d) 5'E-form structure with hemi-protonated cytosines at elevated temperatures, (e) 5'E<sub>GCC</sub> and 5'E<sub>CGG</sub>-form structure with hemi-protonated cytosines at 300K and (f) 5'E-form structure with hemi-protonated cytosines and normal cytosine at 300K with TIP3P water model.

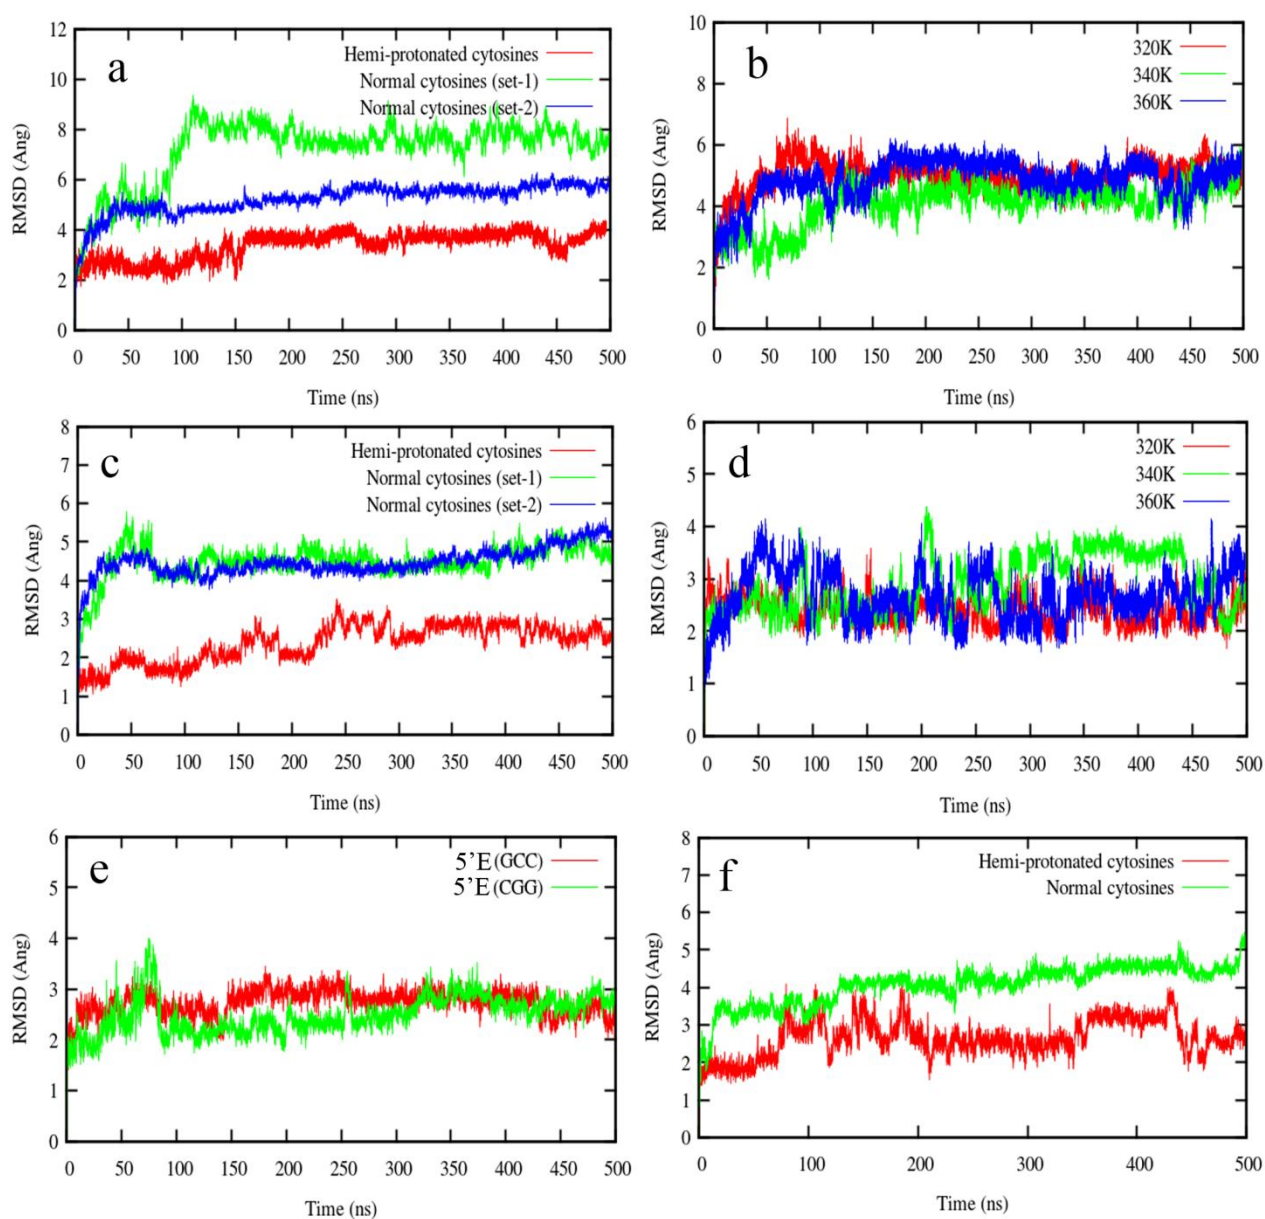

Fig. S2: Representative backbone refined conformations of model (a)-(h)  $C^+C^+C^+/CCC$  trinucleotide structures having different rotational orientation of intercalated base pair about its base pair helix axis and (i)-(p) tetranucleotide structures of two intercalated  $C^+C^+/CC$  dinucleotides with different helical rotations around their base pair helix axis.

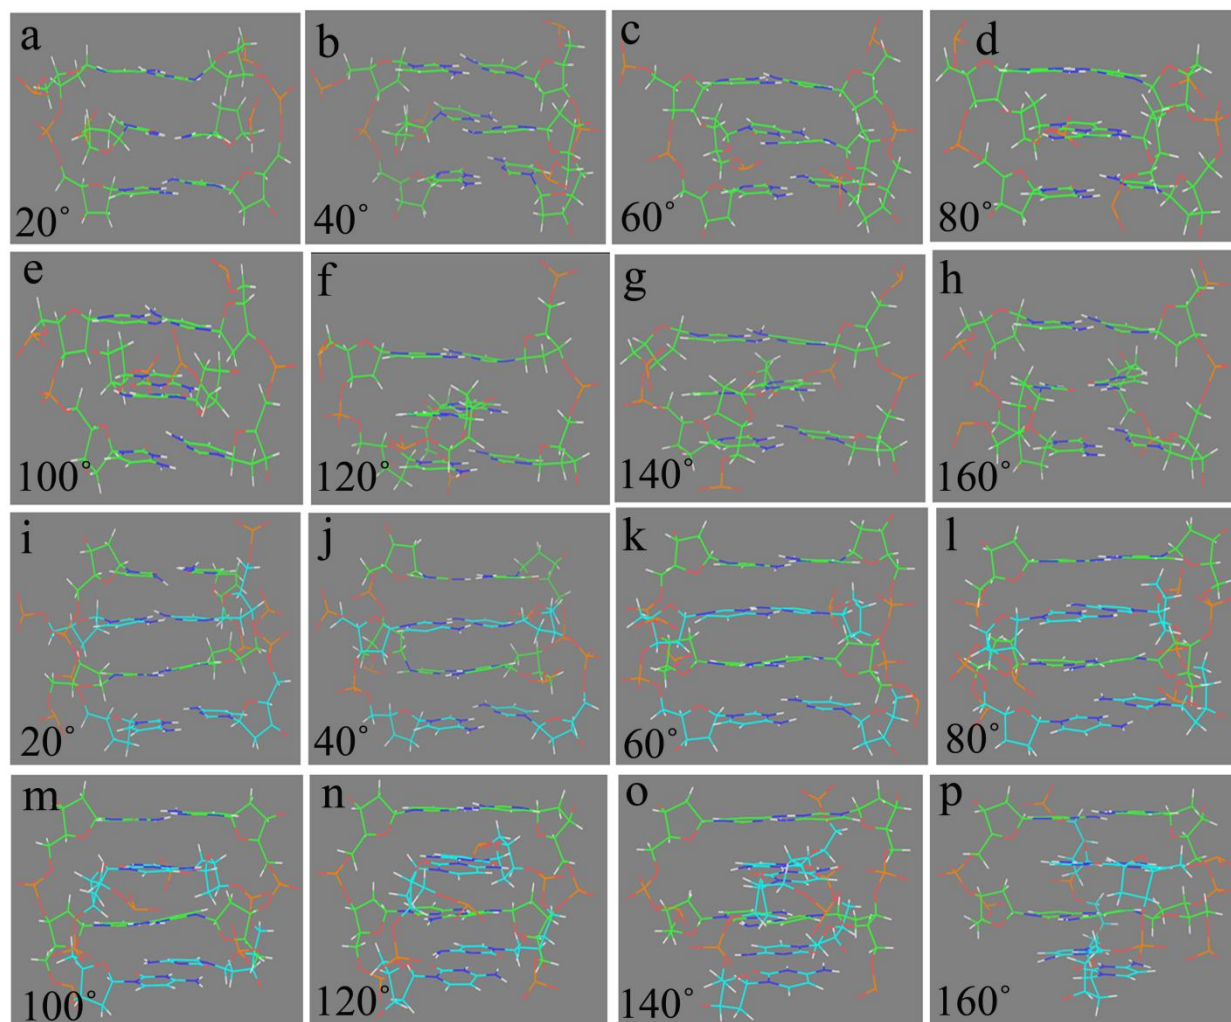

Fig. S3: Root mean square fluctuation (RMSF) of the nucleotides in (a) 3'E and (b) 5'E-form i-motif structure under acidic pH with hemi-protonated cytosines.

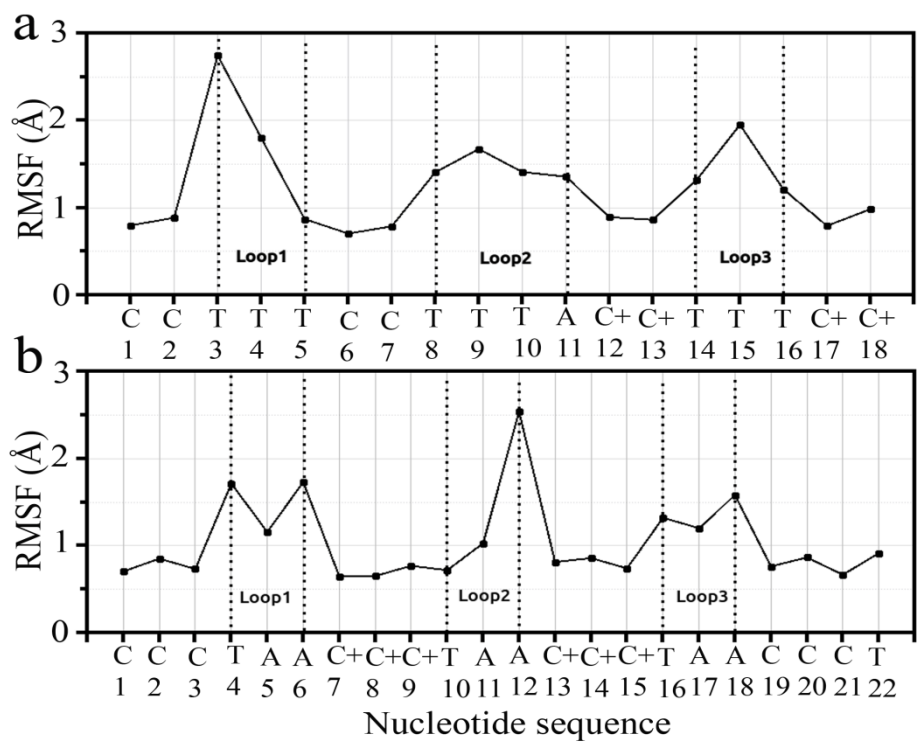

Fig. S4: Distribution of distance between the N3 atoms of paired bases in equilibrated MD trajectory of 3'E (a) and 5'E-form (b) i-motif structure with hemi-protonated cytosines, and distance matrix for the nucleobases in equilibrated conformation of 3'E (c) and 5'E-form (d) i-motif structure with hemi-protonated cytosines.

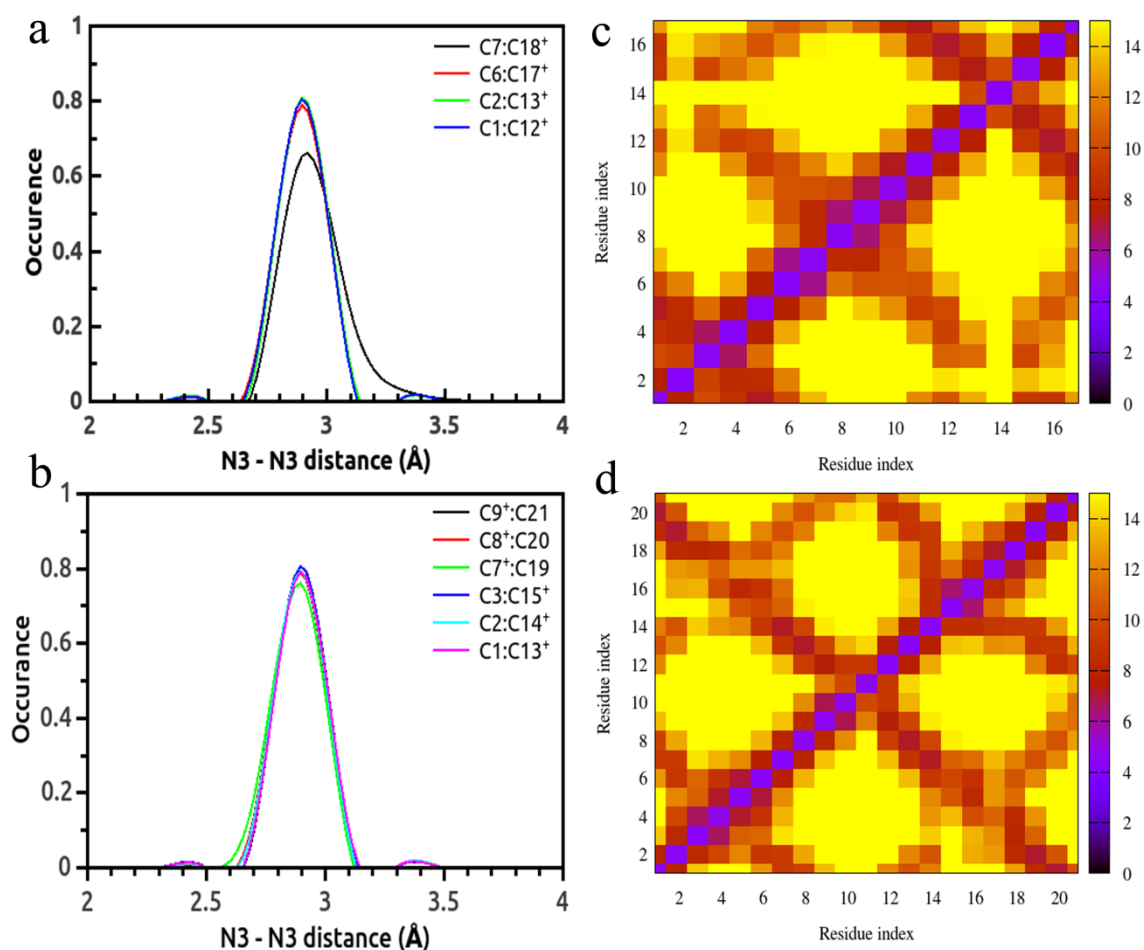

Fig. S5: Variation of distance between the N3 atoms of paired bases along the MD simulated trajectory of 3'E (a)-(b) and 5'E-form (c)-(d) structure in deprotonated state with normal cytosines.

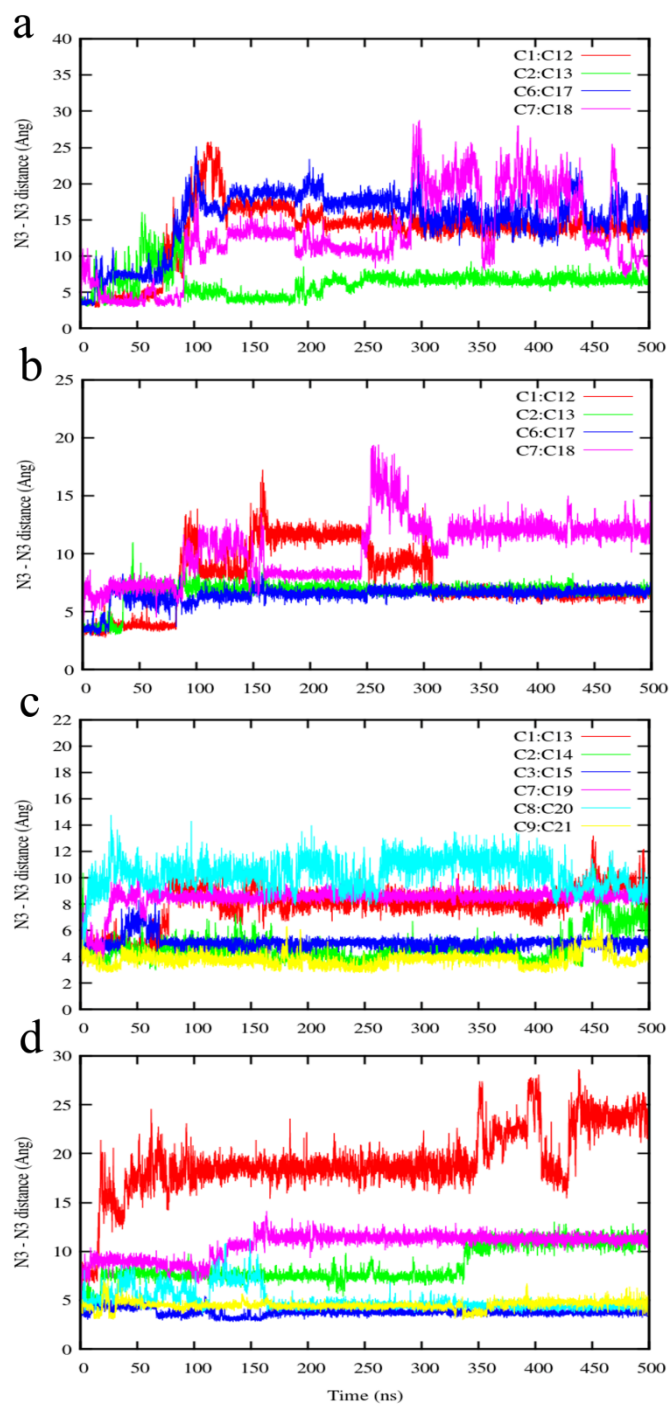

Fig. S6: Average conformation of (a) 3'E and (b) 5'E-form structure, and distance matrix for the nucleobases in equilibrated conformation of (c) 3'E and (d) 5'E-form structure under neutral pH with deprotonated cytosines.

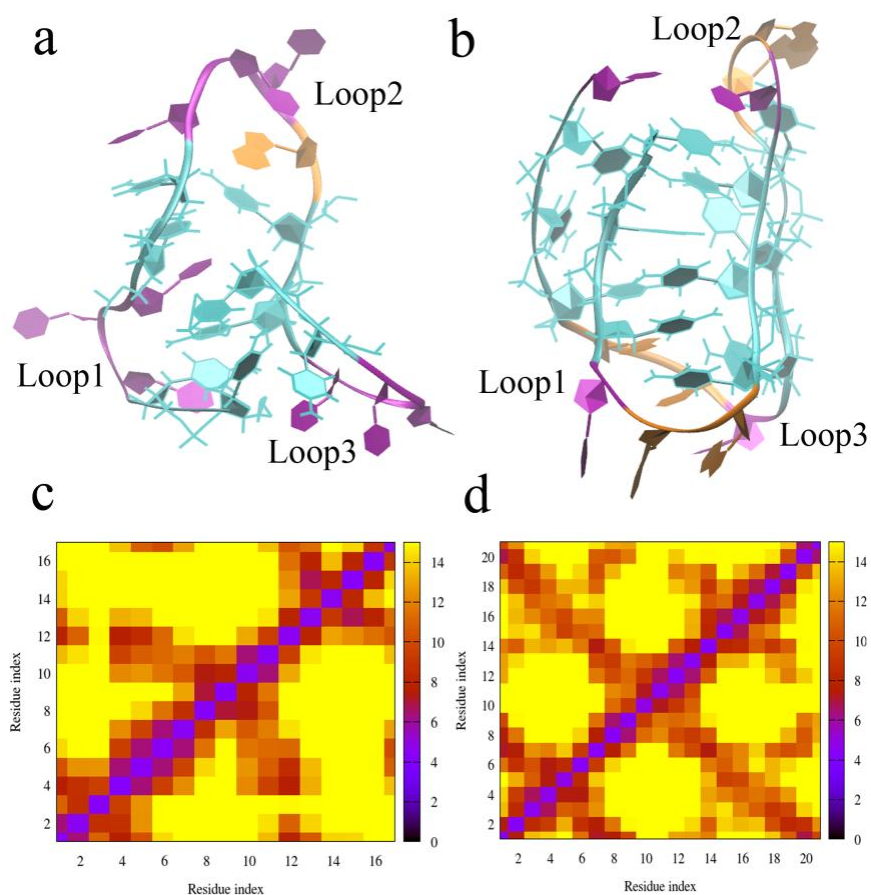

Fig. S7: Variation of distance between the N3 atoms of paired bases along the MD simulated trajectory of 3'E (a) and 5'E-form (b) structure in deprotonated state with normal cytosine considering larger simulation box, and considering TIP3P water model in case of 5'E-form structure (c).

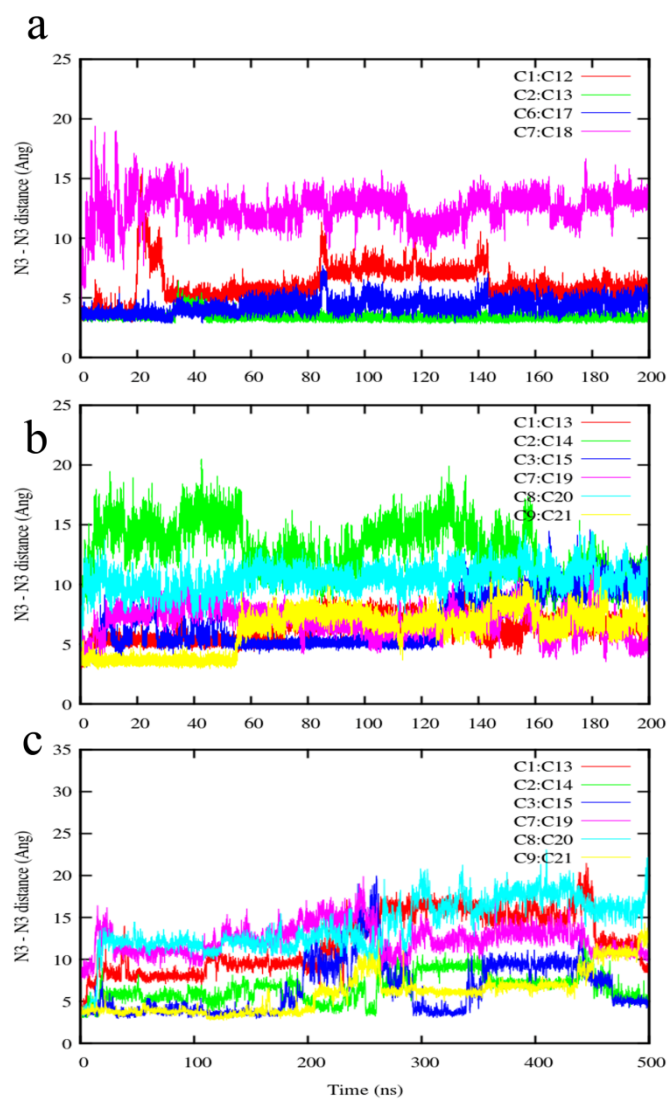

Fig. S8: 1<sup>st</sup> and 2<sup>nd</sup> normal mode of motions in the equilibrated MD trajectory of (a)-(b) 3'E and (c)-(d) 5'E-form structure under neutral pH with deprotonated cytosines.

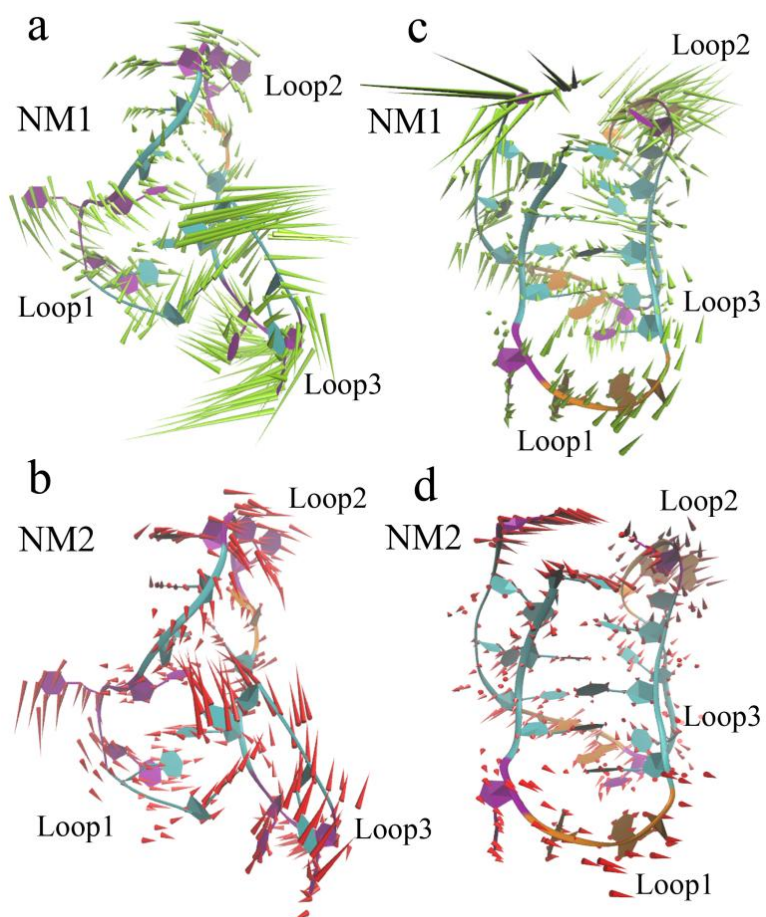

Fig. S9: Average structure of i-motif core in the equilibrated MD trajectory of (a) 3'E and (b) 5'E-form topology under acidic pH with hemi-protonted cytosines.

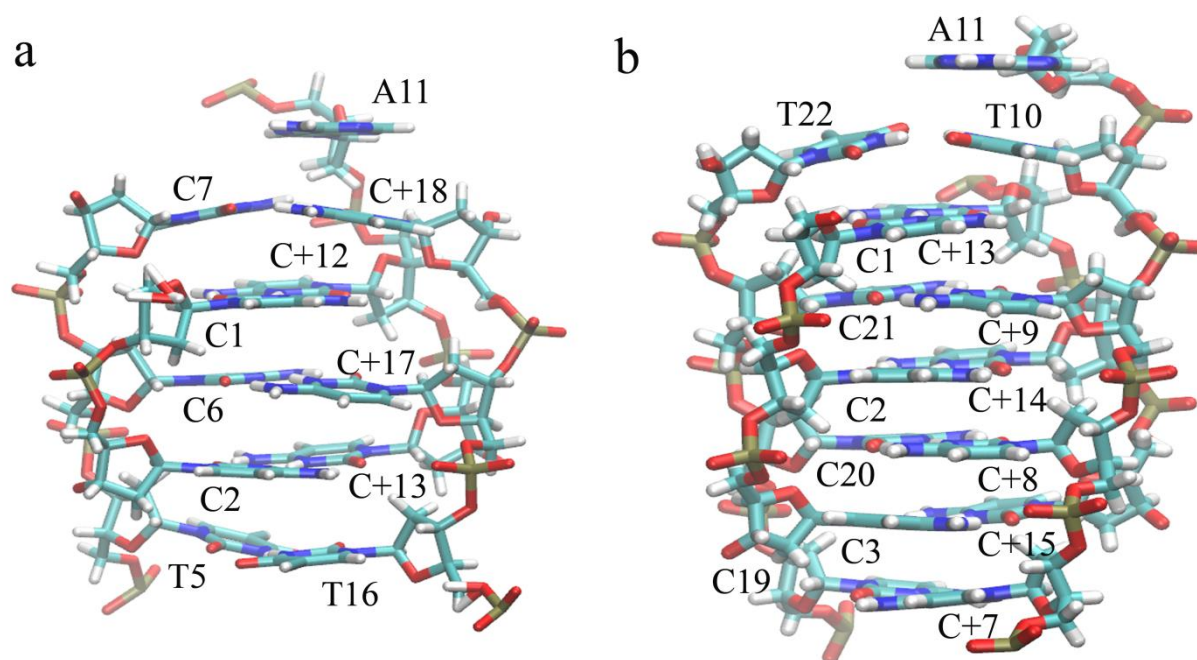

Fig. S10: Average values along with standard deviations of narrow grooves and wide grooves backbone phosphate-phosphate distances in (a)-(b) 3'E and (c)-(d) 5'E-form i-motif structure under acidic pH with hemi-protonted cytosines.

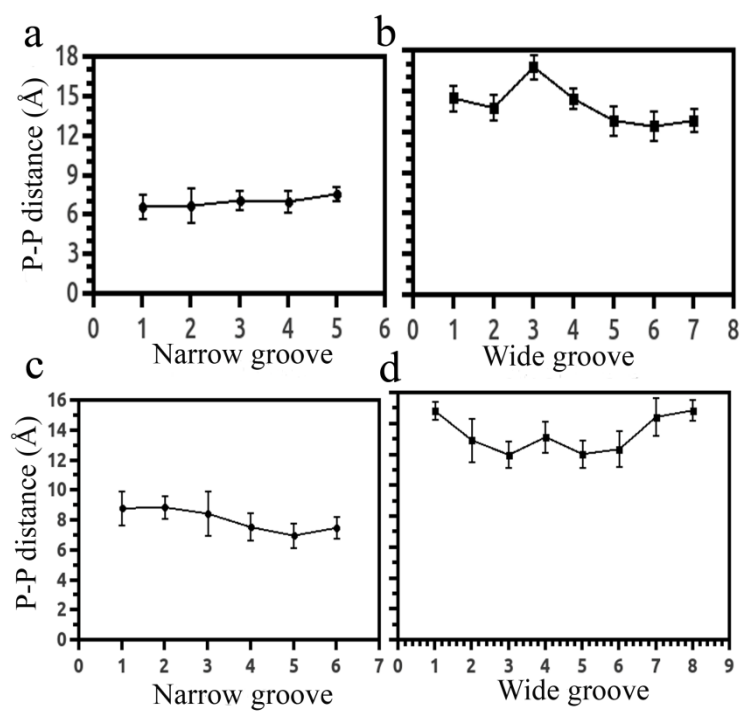

Fig. S11: Variation of energy of the sugar-phosphate backbone refined conformation of model (a)  $C^+C^+C^+/CCC$  trinucleotide structure with helical rotations ( $\theta$ ) of the intercalated base pair around their base pair helix axis, and (b) tetranucleotide conformations of two intercalated  $C^+C^+/CC$  dinucleotides with helical rotations ( $\theta$ ) around their base pair helix axis.

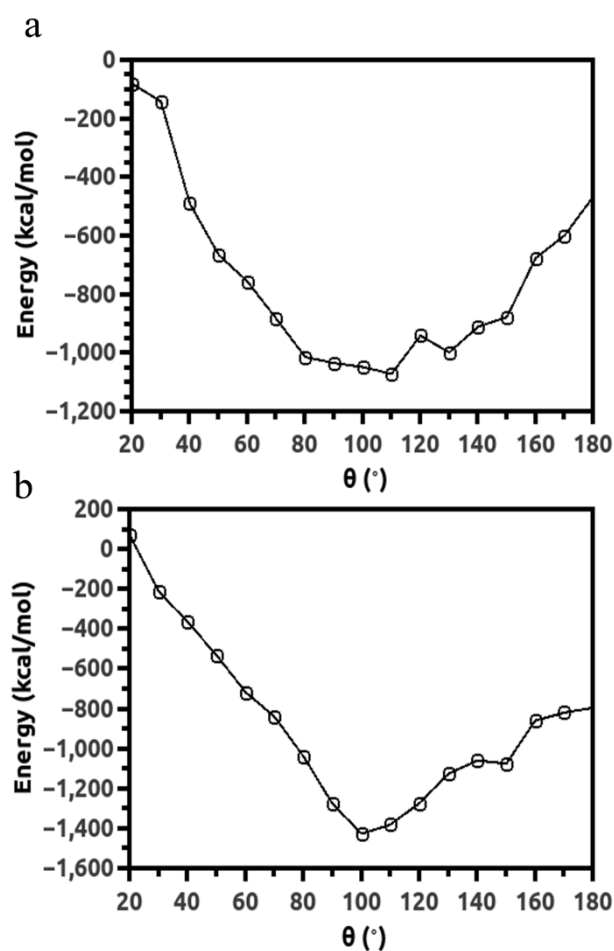

Fig. S12: Radial distributions of the oxygen (O) atom of solvent water molecule around backbone phosphate group of bases ( $g(r_{p-o})$ ) within i-motif core with hemi-protonated cytosines under acidic pH for (a) 3'E and (b) 5'E-form structure, and in deprotonated state of cytosines under neutral pH for (c) 3'E and (d) 5'E-form structure.

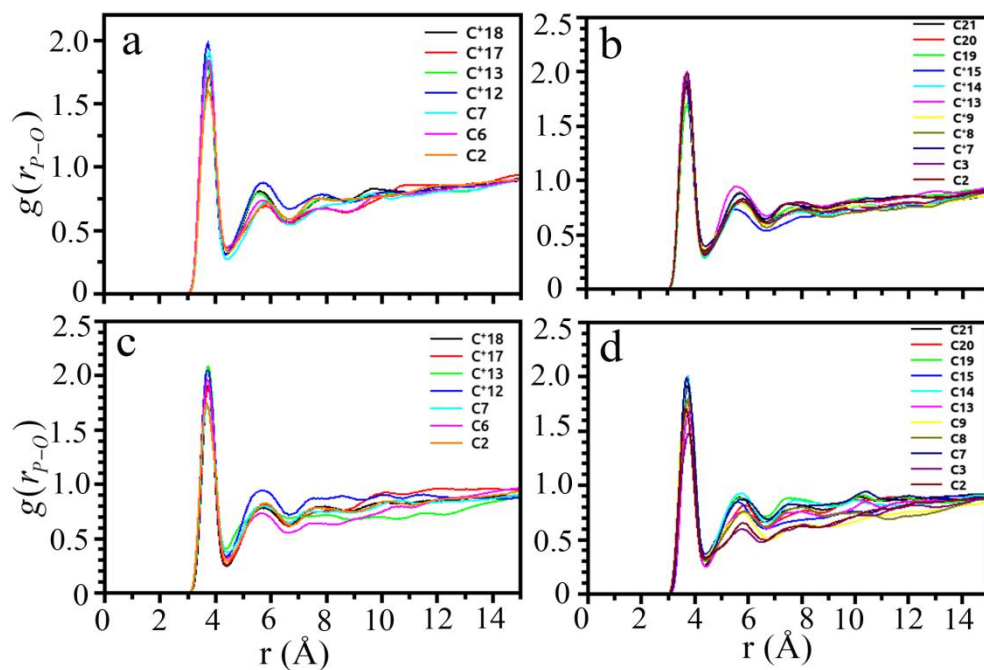

Fig. S13: Radial distributions of the oxygen (O) atoms of solvent water molecule around N4 atom of cytosines ( $g(r)$ ) within i-motif core in hemi-protonated and deprotonated state of cytosines for (a) 3'E and (b) 5'E-form structure considering SPC/E water model, and (c) 5'E-form structure considering TIP3P water model.

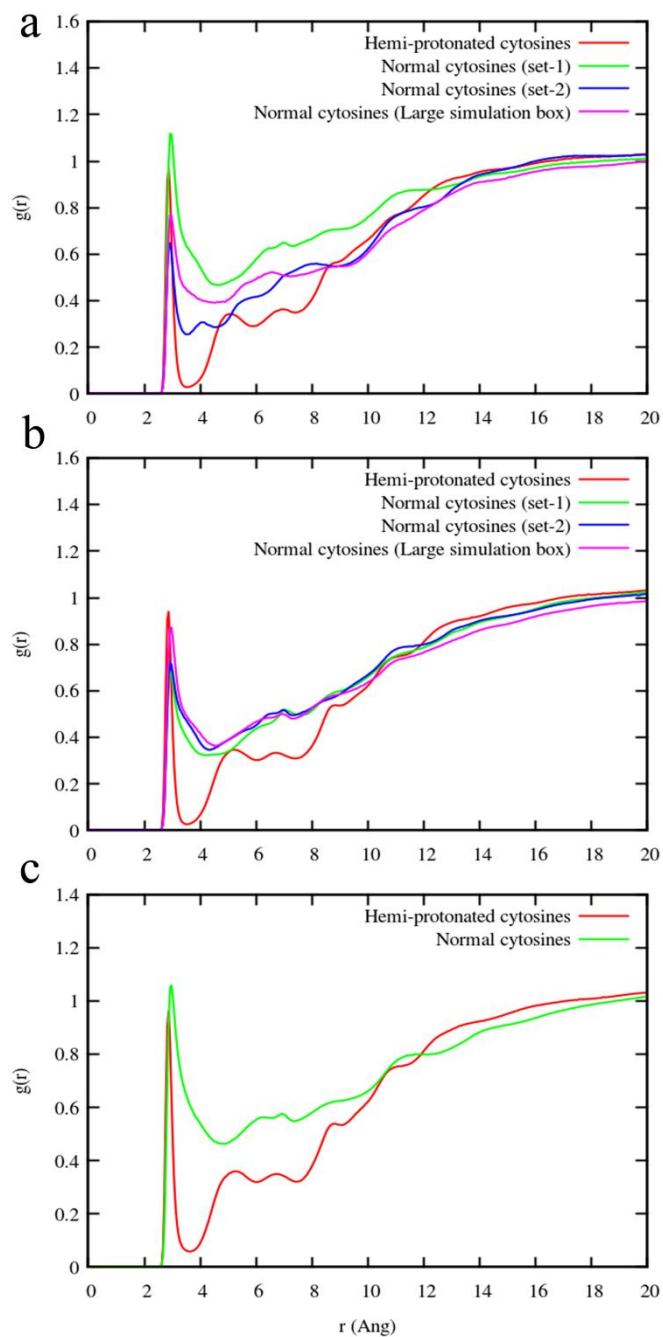

Fig. S14: Radial distributions of the oxygen (O) atoms of solvent water molecule around N4 atom of cytosines ( $g(r_{N4-O})$ ) within i-motif core at elevated temperatures with hemi-protonated cytosines under acidic pH for (a) 3'E and (b) 5'E-form i-motif structure.

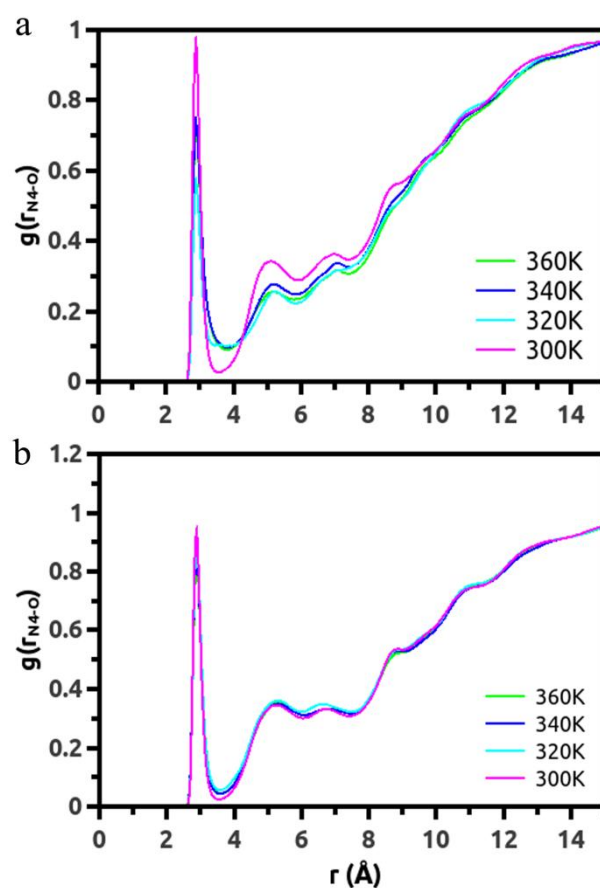

Fig. S15: (a) DFT optimized geometry of six water molecules in wider grooves first solvation cell considering MD average model conformation of C<sup>+</sup>C<sup>+</sup>C<sup>+</sup>/CCC trinucleotide within the i-motif core and fixing all the non-hydrogen atoms of the bases. (b) DFT optimized structure of a water molecule along with cytosine base.

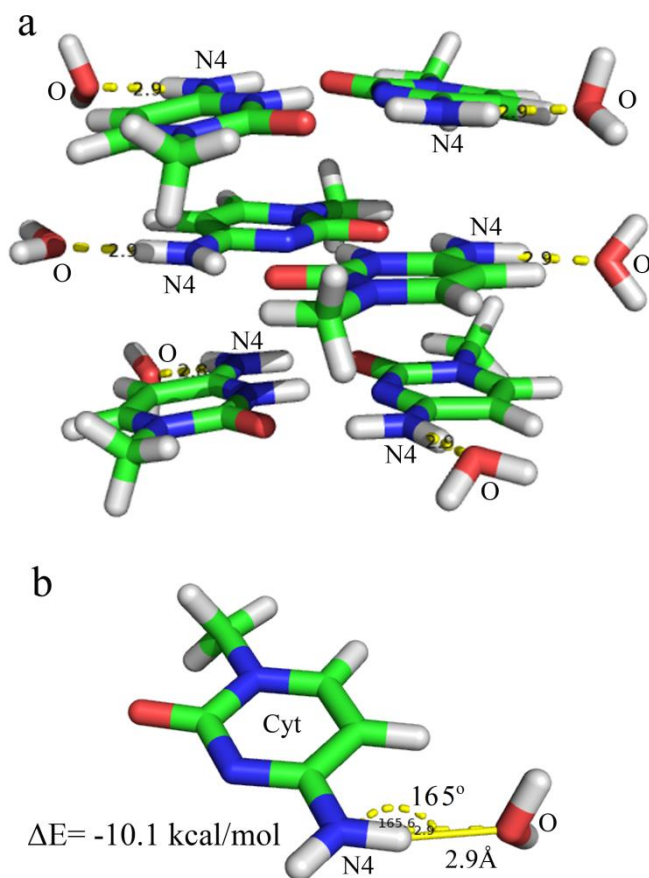

Fig. S16: First normal mode of motions at different temperature in the equilibrated MD trajectory of (a)-(c) 3'E and (d)-(f) 5'E-form i-motif structure under acidic pH with hemi-protonated cytosines.

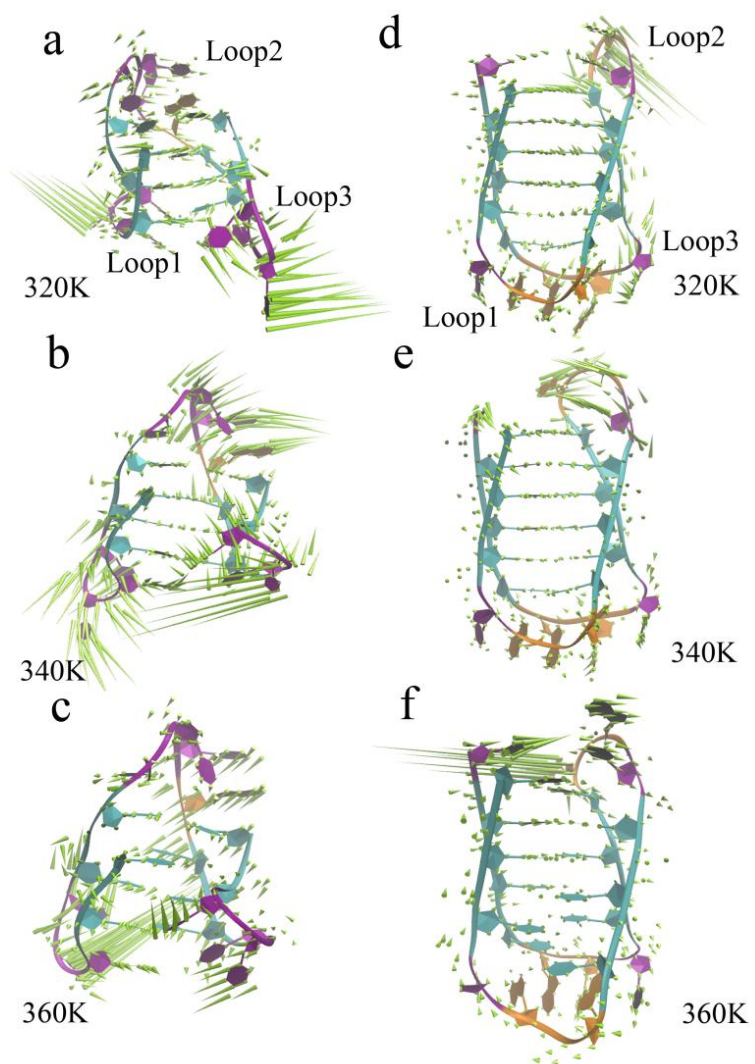

Fig. S17: Root mean square fluctuation (RMSF) of the nucleotides at different temperature in (a) 3'E and (b) 5'E-form i-motif structure with hemi-protonated cytosines under acidic pH.

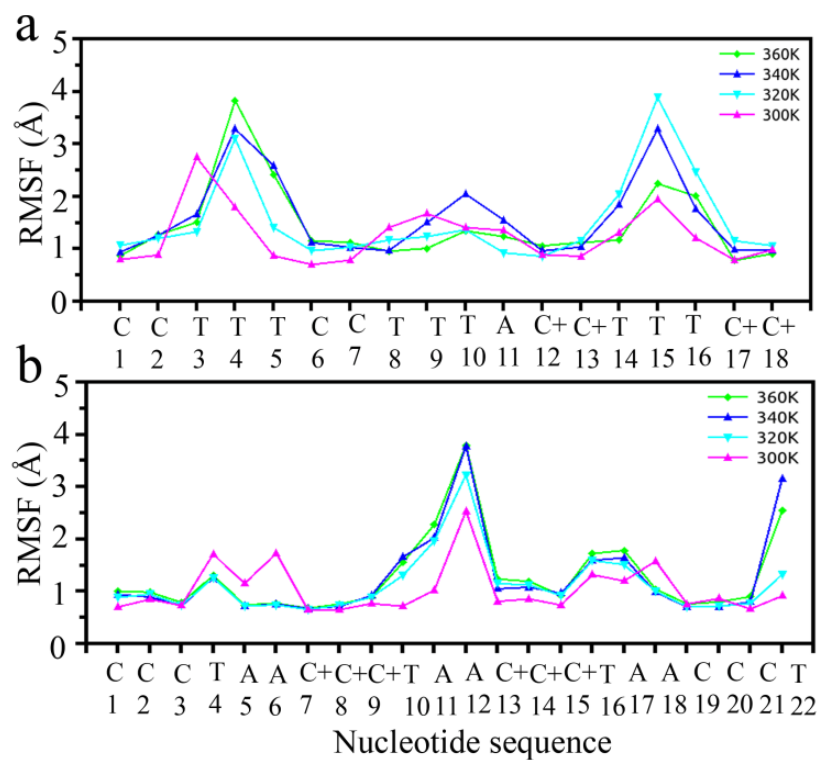

Fig. S18: At different temperature distribution of wide grooves width in (a) 3'E and (b) 5'E-form structure, narrow grooves width in (c) 3'E and (d) 5'E-form structure, and hydrogen bonding distance and angle between sugar oxygen O4' of one strand and C1' on the anti-parallel strand across the narrow grooves in (e) 3'E and (f) 5'E-form structure, as derived from the equilibrated MD trajectory of i-motif DNA under acidic pH with hemi-protonated cytosines.

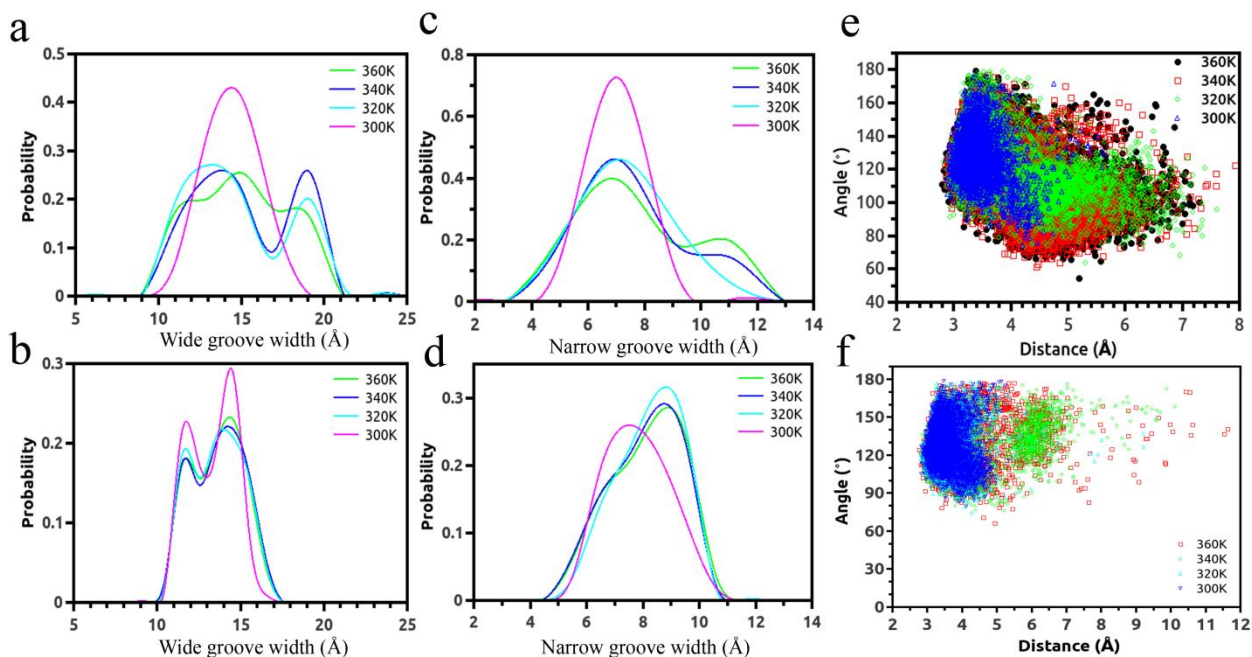

Fig. S19: Temperature dependent grid water density distribution ( $\rho_{\text{wat}}$ ) around the i-motif core in (a)-(c) 3'E and (d)-(f) 5'E-form structure under acidic pH having probability of water molecules stay in that grid points greater than 0.5. Grid points are represented with a sphere of color tints wheat.

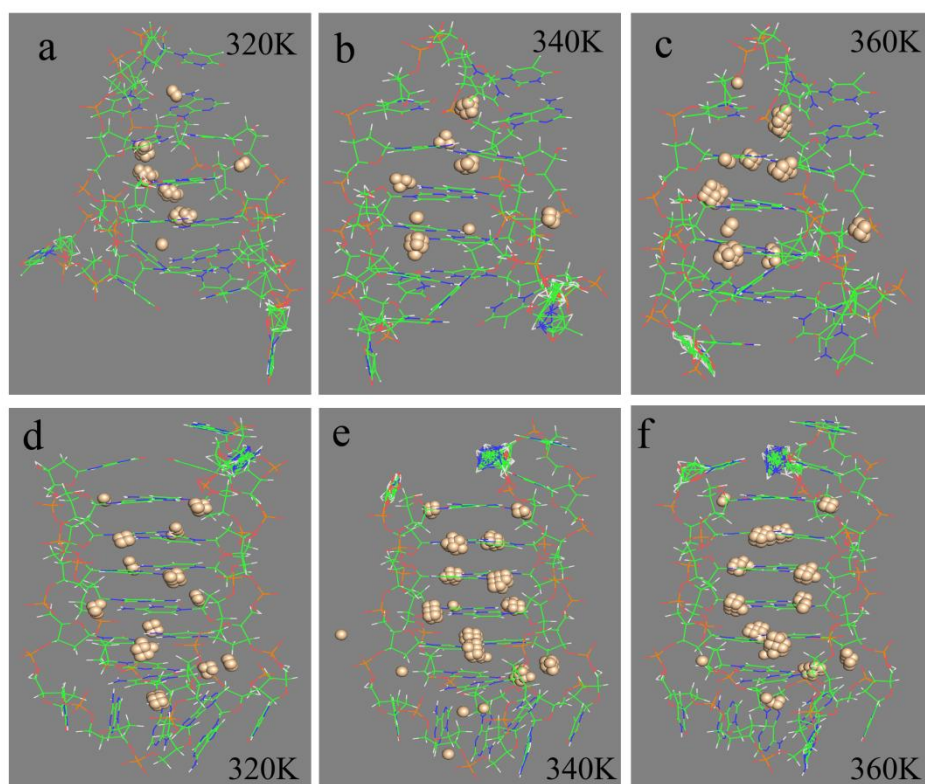

Fig. S20: (a) At different temperature distribution of number of water molecules forming hydrogen bonds with the N4 atom of cytosines in the wide grooves of 5'E-form i-motif DNA in equilibrated trajectory under acidic pH. (b) Distribution of hydrogen bonded life time at different temperature for the hydrogen bonded water molecules in the wide grooves of 5'E-form structure with hemi-protonated cytosines.

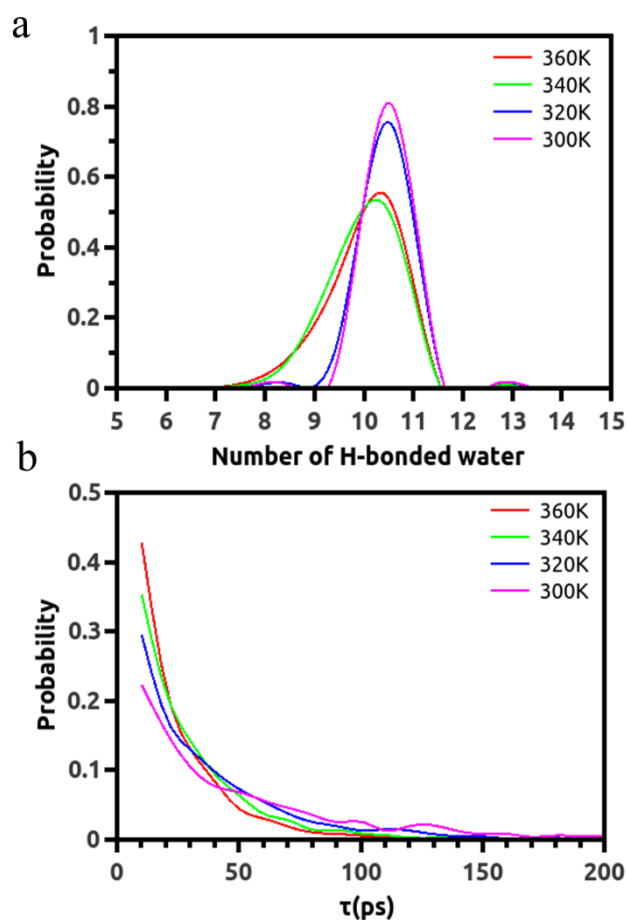

Fig. S21: In case of 5'E<sub>CGG</sub> (a)-(b) and 5'E<sub>GCC</sub> (c)-(d) form structure first two normal modes of motions in the equilibrated trajectory. Distribution of (e) narrow grooves width and (f) hydrogen bonding distance and angle between sugar oxygen O4' of one strand and C1' on the anti-parallel strand across the narrow minor grooves in 5'E (TAA), 5'E<sub>CGG</sub> (CGG) and 5'E<sub>GCC</sub> (GCC) form structure, as derived from the equilibrated MD trajectory of i-motif DNA under acidic pH with hemi-protonted cytosines.

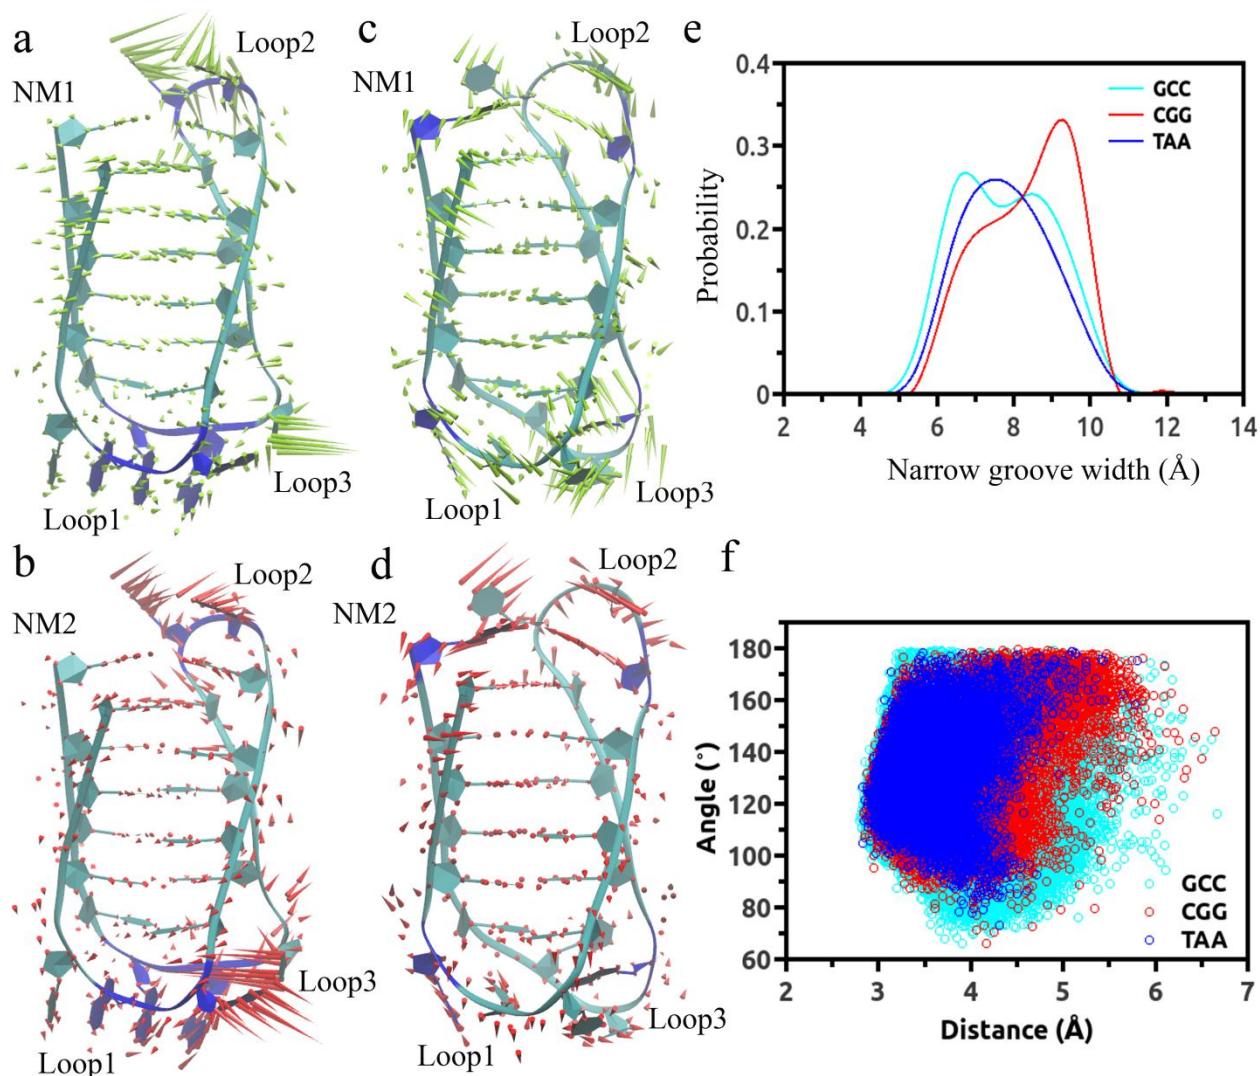

Supplement: c9cp03253c1.pdf [file c9cp03253c1.pdf]
